# Supplementary material for: cDNA microarray analysis of bovine embryo gene expression profiles during the pre-implantation period
Source: PubMed Central journal article supplement (PMC535809; doi:10.1186/1477-7827-2-77), 2004-11-24
Supplement: 1477-7827-2-77-S1.pdf [file 1477-7827-2-77-S1.pdf]

**Supplement Table 1**

Two-fold differentially expressed genes between Day7E vs Day 14E.

| Accession#                                   | Gene name                                                  | D14E/D7E k-means | classification |
|----------------------------------------------|------------------------------------------------------------|------------------|----------------|
| Day 14E /Day 7E down-regulated genes (< 0.5) |                                                            |                  |                |
| AW484050                                     | EST                                                        | 0.19             | 11             |
| L07872                                       | Homo sapiens Jk-recombination signal binding protein       | 0.19             | 8              |
| NM_001294                                    | Homo sapiens CLPTM1                                        | 0.23             | 4              |
| NM_001021                                    | Homo sapiens ribosomal protein S17 (RPS17)                 | 0.25             | 8              |
| M20866                                       | Sus scrofa cofilin                                         | 0.25             | 1              |
| BP110964                                     | EST                                                        | 0.26             | 1              |
| BP110413                                     | EST                                                        | 0.28             | 8              |
| M21683                                       | Sus scrofa nonhistone protein HMG1                         | 0.30             | 8              |
| AF020508                                     | Bos taurus PAG-6                                           | 0.36             | 11             |
| BP106894                                     | EST                                                        | 0.36             | 8              |
| BP110830                                     | EST                                                        | 0.38             | 8              |
| BP107823                                     | EST                                                        | 0.38             | 8              |
| AW354303                                     | EST                                                        | 0.39             | 8              |
| AF020507                                     | Bos taurus PAG-5                                           | 0.39             | 11             |
| AW470389                                     | EST                                                        | 0.39             | 1              |
| X91755                                       | Bos taurus cathepsin L                                     | 0.42             | 8              |
| BP110986                                     | EST                                                        | 0.43             | 4              |
| NM_005722                                    | Homo sapiens ARP2 actin-related protein 2 homolog (yeast)  | 0.43             | 8              |
| AF210381                                     | Bos taurus DDVit1                                          | 0.44             | 4              |
| BP110238                                     | EST                                                        | 0.45             | 5              |
| AF020506                                     | Bos taurus PAG-4                                           | 0.46             | 1              |
| BP110294                                     | EST                                                        | 0.47             | 8              |
| AW426990                                     | EST                                                        | 0.47             | 8              |
| U21660                                       | Bos taurus phosphatidylcholine transfer protein            | 0.47             | 4              |
| L02897                                       | Dog nonerythroid beta-spectrin                             | 0.47             | 9              |
| AF166124                                     | Homo sapiens selenoprotein X                               | 0.49             | 8              |
| Day 14E /Day 7E up-regulated genes (2 <)     |                                                            |                  |                |
| X98834                                       | Homo sapiens zinc finger protein, Hsal2                    | 2.00             | 12             |
| AW462039                                     | EST                                                        | 2.00             | 8              |
| BP112562                                     | EST                                                        | 2.00             | 1              |
| BP111442                                     | EST                                                        | 2.00             | 3              |
| AF063243                                     | Bos taurus ribosomal protein L30                           | 2.01             | 6              |
| BP108322                                     | EST                                                        | 2.01             | 10             |
| AF192333                                     | Bos taurus PAG-16                                          | 2.01             | 11             |
| AW463677                                     | EST                                                        | 2.01             | 6              |
| BP108443                                     | EST                                                        | 2.01             | 8              |
| M27239                                       | Bos taurus PRP-II                                          | 2.02             | 11             |
| M12252                                       | Chinese hamster alpha-tubulin I                            | 2.02             | 8              |
| BP106914                                     | EST                                                        | 2.02             | 6              |
| AF057300                                     | Homo sapiens truncated RAD50 protein                       | 2.02             | 3              |
| AW482702                                     | EST                                                        | 2.02             | 7              |
| AF109198                                     | Bos taurus chloride channel protein p64H1                  | 2.02             | 3              |
| AI617792                                     | EST                                                        | 2.02             | 12             |
| X69556                                       | Bos taurus cpn 10                                          | 2.02             | 3              |
| AI991258                                     | EST                                                        | 2.02             | 7              |
| NM_001000                                    | Homo sapiens ribosomal protein L39 (RPL39)                 | 2.03             | 8              |
| Z25466                                       | Bos taurus mitochondrial aspartate aminotransferase        | 2.03             | 10             |
| BP107851                                     | EST                                                        | 2.03             | 7              |
| AF164023                                     | Bos taurus kappa-casein (CSN3)                             | 2.03             | 1              |
| D14531                                       | Homo sapiens homologue of rat ribosomal protein L9         | 2.03             | 6              |
| U69698                                       | Cryptosporidium parvum heat shock protein 70(Hsp 70)       | 2.03             | 2              |
| AF161415                                     | Homo sapiens HSPC297                                       | 2.03             | 4              |
| NM_004738                                    | Homo sapiens VAMP-associated protein B and C (VAPB)        | 2.03             | 2              |
| J05058                                       | Bos taurus cytochrome c oxidase subunit IHQ (VIIb)         | 2.03             | 3              |
| X04849                                       | Bos taurus clathrin light chain a (brain LCa)              | 2.04             | 6              |
| AW483954                                     | EST                                                        | 2.04             | 3              |
| BP112917                                     | EST                                                        | 2.05             | 8              |
| M18344                                       | Bos taurus vitamin D-dependent calcium binding protein     | 2.05             | 11             |
| M11341                                       | Bos taurus low density lipoprotein receptor                | 2.05             | 10             |
| AI983274                                     | EST                                                        | 2.05             | 10             |
| NM_002898                                    | Homo sapiens single stranded interacting protein 2 (RBMS2) | 2.05             | 5              |
| AW417894                                     | EST                                                        | 2.06             | 7              |
| AI796137                                     | EST                                                        | 2.06             | 7              |
| AC004990                                     | Homo sapiens PAC clone RP5-118517 from 7q11.23-q21         | 2.06             | 10             |
| NM_012127                                    | Homo sapiens Cip1-interacting zinc finger protein (CIZ1)   | 2.06             | 8              |
| AW312756                                     | EST                                                        | 2.06             | 2              |
| BP107831                                     | EST                                                        | 2.06             | 3              |
| AW437633                                     | EST                                                        | 2.07             | 6              |
| X63678                                       | Canis familiaris TRAM-protein                              | 2.07             | 3              |
| BP112392                                     | EST                                                        | 2.07             | 10             |
| NM_001259                                    | Homo sapiens cyclin-dependent kinase 6 (CDK6)              | 2.07             | 9              |
| BP109609                                     | EST                                                        | 2.07             | 9              |
| X64126                                       | Bos taurus DNA for SINE sequence Bov-1D                    | 2.08             | 12             |
| BP110908                                     | EST                                                        | 2.08             | 7              |
| AI081391                                     | EST                                                        | 2.08             | 10             |
| NM_000661                                    | Homo sapiens ribosomal protein L9 (RPL9)                   | 2.08             | 6              |
| NM_003369                                    | Homo sapiens UV radiation resistance associated gene       | 2.08             | 10             |
| X73751                                       | EST                                                        | 2.08             | 7              |
| AW480847                                     | EST                                                        | 2.09             | 10             |
| AL036393                                     | EST                                                        | 2.09             | 3              |
| Z85980                                       | Bos taurus capping protein, beta3 isoform                  | 2.10             | 8              |
| AW437818                                     | EST                                                        | 2.10             | 10             |
| U11927                                       | Bos gaurus vacuolar H-ATPase subunit D (VATD)              | 2.10             | 10             |
| AW464287                                     | EST                                                        | 2.10             | 8              |
| AF033095                                     | Homo sapiens testis enhanced gene transcript protein       | 2.10             | 12             |
| BP107313                                     | EST                                                        | 2.10             | 3              |
| AW344559                                     | EST                                                        | 2.10             | 4              |
| L41543                                       | Bos taurus epithelial mucin (MUC1)                         | 2.11             | 11             |
| X63436                                       | Bos taurus poly(A) polymerase                              | 2.11             | 9              |
| AF068846                                     | Homo sapiens scaffold attachment factor A (SAF-A)          | 2.12             | 6              |
| AW479659                                     | EST                                                        | 2.12             | 6              |
| BP112687                                     | EST                                                        | 2.12             | 7              |
| AA112300                                     | EST                                                        | 2.12             | 10             |
| AF044670                                     | Homo sapiens 33 kDa Vamp-associated protein (VAP33)        | 2.12             | 10             |
| X17019                                       | Bos taurus mRNA for delta subunit of ATP synthase          | 2.12             | 8              |

|           |                                                            |      |    |                            |
|-----------|------------------------------------------------------------|------|----|----------------------------|
| L10240    | Homo sapiens EMMPRIN                                       | 2.13 | 7  | ECM & related              |
| AW445987  | EST                                                        | 2.13 | 4  |                            |
| BP109789  | EST                                                        | 2.13 | 10 |                            |
| AW480521  | EST                                                        | 2.13 | 9  |                            |
| BP112434  | EST                                                        | 2.14 | 8  |                            |
| AL031667  | Homo sapiens clone RP4-620E11                              | 2.14 | 7  |                            |
| AF103726  | Gallus gallus peptide elongation factor 1-beta             | 2.14 | 10 | Transcriptional regulator  |
| BP112653  | EST                                                        | 2.14 | 7  |                            |
| D49678    | Bos taurus PAF acetylhydrolase beta-subunit                | 2.14 | 11 | Enzyme                     |
| BP108071  | EST                                                        | 2.14 | 9  |                            |
| AW430401  | EST                                                        | 2.15 | 7  |                            |
| NM_011341 | Mus musculus stromal cell derived factor 4 (Sdf4)          | 2.15 | 7  |                            |
| BP107164  | EST                                                        | 2.15 | 1  |                            |
| AF192334  | Bos taurus PAG-17                                          | 2.15 | 11 | Cytokine family            |
| A1985504  | EST                                                        | 2.16 | 10 |                            |
| AW359235  | EST                                                        | 2.16 | 7  |                            |
| Z33879    | Sus scrofa G-beta like protein                             | 2.17 | 8  |                            |
| A1814715  | EST                                                        | 2.18 | 2  |                            |
| U17836    | Bos taurus acidic ribosomal protein P2                     | 2.18 | 2  | Ribosomal                  |
| AW481254  | EST                                                        | 2.18 | 10 |                            |
| AB032826  | Bos taurus selenoprotein P                                 | 2.18 | 4  |                            |
| AW480847  | EST                                                        | 2.19 | 7  |                            |
| AW315026  | EST                                                        | 2.19 | 12 |                            |
| NM_000985 | Homo sapiens ribosomal protein L17 (RPL17)                 | 2.19 | 6  | Ribosomal                  |
| A1970619  | EST                                                        | 2.19 | 10 |                            |
| AW465455  | EST                                                        | 2.19 | 9  |                            |
| U37459    | Mus musculus glia-derived neurotrophic growth factor       | 2.19 | 9  | Cytokine family            |
| AW260930  | EST                                                        | 2.20 | 4  |                            |
| AW464570  | EST                                                        | 2.20 | 3  |                            |
| AW335986  | EST                                                        | 2.20 | 6  |                            |
| BP112334  | EST                                                        | 2.20 | 8  |                            |
| AF144695  | Mus musculus ERO1L (Ero11)                                 | 2.20 | 6  |                            |
| U13369    | Homo sapiens ribosomal DNA complete repeating unit         | 2.21 | 7  |                            |
| AF161418  | Homo sapiens HSPC300                                       | 2.21 | 6  |                            |
| A1350705  | EST                                                        | 2.21 | 10 |                            |
| BP108366  | EST                                                        | 2.21 | 12 |                            |
| AW466029  | EST                                                        | 2.22 | 5  |                            |
| AF000152  | Homo sapiens OS-4 protein                                  | 2.22 | 2  |                            |
| AW427810  | EST                                                        | 2.22 | 10 |                            |
| AW298224  | EST                                                        | 2.22 | 6  |                            |
| M19962    | Bos taurus cytochrome c oxidase subunit Vb (coxVb)         | 2.22 | 9  | Enzyme                     |
| AA933095  | EST                                                        | 2.22 | 10 |                            |
| BP109858  | EST                                                        | 2.23 | 2  |                            |
| NM_006283 | Homo sapiens TACC1                                         | 2.23 | 5  |                            |
| A1061614  | EST                                                        | 2.23 | 6  |                            |
| AF002693  | Homo sapiens ATQL1 pseudogene                              | 2.24 | 2  |                            |
| BP110513  | EST                                                        | 2.24 | 9  |                            |
| AW486974  | EST                                                        | 2.25 | 10 |                            |
| AC002550  | Homo sapiens BAC clone CIT987SK-A-101F10                   | 2.26 | 9  |                            |
| NM_001023 | Homo sapiens ribosomal protein S20 (RPS20)                 | 2.26 | 8  | Ribosomal                  |
| BP112699  | EST                                                        | 2.26 | 7  |                            |
| D45887    | Homo sapiens calmodulin                                    | 2.26 | 6  | Oncogene & Tumor inhibitor |
| BP111373  | EST                                                        | 2.27 | 10 |                            |
| H44982    | EST                                                        | 2.27 | 10 |                            |
| BP111869  | EST                                                        | 2.27 | 6  |                            |
| BP107816  | EST                                                        | 2.27 | 10 |                            |
| BP109830  | EST                                                        | 2.27 | 12 |                            |
| BP112736  | EST                                                        | 2.27 | 3  |                            |
| AJ004935  | Urechis caupo cytoplasmic intermediate filament protein    | 2.27 | 10 | Cytoskelton                |
| BP107808  | EST                                                        | 2.27 | 9  |                            |
| U65789    | Bos taurus intercellular adhesion molecule-1 (bovICAM-1)   | 2.27 | 8  | Cell adhesion              |
| Z29555    | Bos taurus ribosomal protein L3                            | 2.28 | 8  | Ribosomal                  |
| D84557    | Homo sapiens HsMcm6                                        | 2.28 | 12 |                            |
| AW461475  | EST                                                        | 2.28 | 10 |                            |
| AW477773  | EST                                                        | 2.28 | 10 |                            |
| BP106875  | EST                                                        | 2.28 | 6  |                            |
| AF132048  | Homo sapiens foocen-s                                      | 2.29 | 6  |                            |
| NM_007278 | Homo sapiens GABA(A) receptor-associated protein           | 2.29 | 9  |                            |
| M22559    | Bos taurus ATP synthase inhibitor protein                  | 2.30 | 6  |                            |
| AF081484  | Homo sapiens alpha-tubulin isoform 1                       | 2.30 | 6  | Cytoskelton                |
| BP111623  | EST                                                        | 2.30 | 1  |                            |
| AW403893  | EST                                                        | 2.31 | 10 |                            |
| NM_001015 | Homo sapiens ribosomal protein S11 (RPS11)                 | 2.31 | 12 | Ribosomal                  |
| AW316336  | EST                                                        | 2.31 | 4  |                            |
| AW307877  | EST                                                        | 2.31 | 3  |                            |
| NM_005600 | Homo sapiens nitrilase 1 (NIT1)                            | 2.31 | 7  | Enzyme                     |
| NM_006156 | Homo sapiens NEDD8                                         | 2.32 | 12 |                            |
| NM_004596 | Homo sapiens small nuclear ribonucleoprotein polypeptide A | 2.32 | 12 | Nuclear protein            |
| AW487141  | EST                                                        | 2.32 | 8  |                            |
| AB028449  | Homo sapiens mRNA for helicase-MOI                         | 2.32 | 9  | DNA binding protain        |
| M83656    | Bos taurus cytoplasmic phosphotyrosyl protein phosphatase  | 2.33 | 9  | Enzyme                     |
| S61826    | Homo sapiens OXPHOS system complex III mitochondrial sub   | 2.34 | 12 | Mitochondrial              |
| Z18245    | Bos taurus gpolyubiquitin                                  | 2.34 | 12 | Heat shock protein         |
| AW249038  | EST                                                        | 2.35 | 7  |                            |
| NM_000291 | Homo sapiens phosphoglycerate kinase 1 (PGK1)              | 2.35 | 10 | Enzyme                     |
| BP112667  | EST                                                        | 2.35 | 10 |                            |
| AW484653  | EST                                                        | 2.35 | 9  |                            |
| BP109619  | EST                                                        | 2.35 | 4  |                            |
| BP111617  | EST                                                        | 2.36 | 10 |                            |
| AW492642  | EST                                                        | 2.36 | 10 |                            |
| BP109456  | EST                                                        | 2.36 | 7  |                            |
| AW356092  | EST                                                        | 2.36 | 12 |                            |
| AF160877  | Cercopithecus aethiops ERGIC-53                            | 2.36 | 1  |                            |
| AF070659  | Homo sapiens HSPC003                                       | 2.37 | 12 |                            |
| Y10811    | Bos taurus precystatin C                                   | 2.37 | 9  | Oncogene & Tumor inhibitor |
| AF013215  | Bos taurus ribosomal protein S2                            | 2.37 | 12 | Ribosomal                  |
| X03266    | Sus scrofa inhibin beta (a)-subunit                        | 2.37 | 7  | Cytokine family            |
| BP107704  | EST                                                        | 2.37 | 4  |                            |
| BP112838  | EST                                                        | 2.38 | 8  |                            |
| AW463993  | EST                                                        | 2.38 | 11 |                            |

|           |                                                              |      |    |                            |
|-----------|--------------------------------------------------------------|------|----|----------------------------|
| AW325420  | EST                                                          | 2.38 | 10 |                            |
| X03205    | Homo sapiens 18S ribosomal RNA                               | 2.39 | 2  |                            |
| AL096857  | Homo sapiens chromosome 1 which has similarities to BAT2     | 2.40 | 10 |                            |
| W54378    | EST                                                          | 2.40 | 9  |                            |
| AJ243486  | Cyprinus carpio uncoupling protein 2                         | 2.40 | 2  |                            |
| AW483823  | EST                                                          | 2.40 | 10 |                            |
| BP111712  | EST                                                          | 2.40 | 8  |                            |
| AF062342  | Homo sapiens p120 catenin isoform 4ABC (CTNND1)              | 2.40 | 10 | Oncogene & Tumor inhibitor |
| AB032251  | Homo sapiens bromodomain PHD finger transcription factor     | 2.41 | 10 | Transcriptional regulator  |
| BP113033  | EST                                                          | 2.41 | 12 |                            |
| AW461681  | EST                                                          | 2.41 | 10 |                            |
| AC005037  | Homo sapiens BAC clone RP11-469M7 from 2                     | 2.41 | 2  |                            |
| AF054185  | Homo sapiens proteasome subunit HSPC                         | 2.41 | 8  |                            |
| AJ000186  | Homo sapiens MAD2 protein                                    | 2.41 | 7  | Cytokine family            |
| BP111440  | EST                                                          | 2.41 | 9  |                            |
| AF023860  | Cercopithecus aethiops cyclophilin A                         | 2.41 | 6  |                            |
| X76980    | Bos taurus epsilon-COP                                       | 2.42 | 8  |                            |
| AW313925  | EST                                                          | 2.42 | 10 |                            |
| AW345047  | EST                                                          | 2.43 | 9  |                            |
| AW476334  | EST                                                          | 2.43 | 7  |                            |
| BP112666  | EST                                                          | 2.43 | 3  |                            |
| AA157075  | EST                                                          | 2.44 | 1  |                            |
| AF078863  | Homo sapiens PTD010                                          | 2.44 | 8  |                            |
| BP108543  | EST                                                          | 2.44 | 10 |                            |
| AW345779  | EST                                                          | 2.44 | 3  |                            |
| U94889    | Ovis aries glyceraldehyde-3-phosphate dehydrogenase          | 2.44 | 6  | Enzyme                     |
| NM_007475 | Mus musculus acidic ribosomal phosphoprotein PO (Arbp)       | 2.45 | 6  | Ribosomal                  |
| AI500332  | EST                                                          | 2.45 | 10 |                            |
| U49973    | Homo sapiens Tigger1 transposable element                    | 2.45 | 9  |                            |
| AW485697  | EST                                                          | 2.46 | 3  |                            |
| AL133034  | Homo sapiens mRNA; cDNA DKFZp727K171                         | 2.46 | 11 |                            |
| BP109873  | EST                                                          | 2.46 | 7  |                            |
| AW314606  | EST                                                          | 2.47 | 10 |                            |
| AF153686  | Homo sapiens calcium binding protein precursor               | 2.47 | 3  |                            |
| D63486    | Homo sapiens KIAA0152                                        | 2.48 | 7  |                            |
| NM_005872 | Homo sapiens breast carcinoma amplified sequence 2           | 2.48 | 2  | Oncogene & Tumor inhibitor |
| G29060    | EST                                                          | 2.49 | 3  |                            |
| J03604    | Bos taurus glutamine synthetase                              | 2.49 | 9  | Enzyme                     |
| U22232    | Felis domesticus ribosomal protein S4                        | 2.49 | 6  | Ribosomal                  |
| AW417998  | EST                                                          | 2.49 | 9  |                            |
| AI922214  | EST                                                          | 2.49 | 10 |                            |
| M60073    | Bos taurus tissue inhibitor of metalloproteinase             | 2.50 | 3  | ECM & related              |
| AV405328  | EST                                                          | 2.50 | 10 |                            |
| D13891    | Homo sapiens Id-2H                                           | 2.50 | 7  | Apoptosis & Cell cycle     |
| AF059507  | Bos taurus epidermal fatty acid-binding protein (E-FABP)     | 2.50 | 9  |                            |
| AF196320  | Bos taurus Interferon-tau1C                                  | 2.50 | 2  | Cytokine family            |
| BP111789  | EST                                                          | 2.50 | 6  |                            |
| AF148221  | Sus scrofa Fe epsilon receptor gamma chain                   | 2.50 | 3  |                            |
| AW409802  | EST                                                          | 2.51 | 7  |                            |
| AA933350  | EST                                                          | 2.51 | 2  |                            |
| X64125    | Bos taurus DNA for SINE sequence Bov-2                       | 2.52 | 2  |                            |
| NM_005617 | Homo sapiens ERP28                                           | 2.52 | 8  |                            |
| L06151    | Bos taurus PAG-2                                             | 2.52 | 11 | Cytokine family            |
| S78798    | Homo sapiens 1-phosphatidylinositol-4-phosphate 5-kinase iso | 2.53 | 2  | Oncogene & Tumor inhibitor |
| R69737    | EST                                                          | 2.53 | 10 |                            |
| AI326172  | EST                                                          | 2.53 | 12 |                            |
| D29805    | Homo sapiens mRNA for beta-1,4-galactosyltransferase         | 2.54 | 3  | Enzyme                     |
| AI439018  | EST                                                          | 2.54 | 10 |                            |
| BP112742  | EST                                                          | 2.54 | 8  |                            |
| BP112039  | EST                                                          | 2.54 | 7  |                            |
| BP111381  | EST                                                          | 2.54 | 10 |                            |
| NM_006888 | Homo sapiens calmodulin 1(CALM1)                             | 2.55 | 3  | Oncogene & Tumor inhibitor |
| V01270    | Rattus norvegicus 18S, 5.8S, and 28S ribosomal RNAs          | 2.55 | 3  |                            |
| BP112155  | EST                                                          | 2.56 | 8  |                            |
| NM_005766 | Homo sapiens FERM, RhoGEF (ARHGEF)                           | 2.56 | 10 | Cell adhesion              |
| AW137541  | EST                                                          | 2.56 | 7  |                            |
| AW352968  | EST                                                          | 2.56 | 10 |                            |
| X98054    | Homo sapiens G13 protein                                     | 2.56 | 12 |                            |
| NM_001009 | Homo sapiens ribosomal protein S5 (RPSS5)                    | 2.56 | 3  | Ribosomal                  |
| NM_002568 | Homo sapiens poly(A) binding protein, cytoplasmic 1          | 2.57 | 2  | DNA binding protein        |
| AW073680  | EST                                                          | 2.57 | 7  |                            |
| BP110049  | EST                                                          | 2.57 | 6  |                            |
| BP111430  | EST                                                          | 2.57 | 10 |                            |
| NM_009081 | Mus musculus ribosomal protein L28 (Rpl28)                   | 2.57 | 4  | Ribosomal                  |
| AF195022  | Bos taurus mucin (Muc1)                                      | 2.57 | 9  | Cell adhesion              |
| BP112702  | EST                                                          | 2.58 | 6  |                            |
| AW113078  | EST                                                          | 2.58 | 7  |                            |
| AW485507  | EST                                                          | 2.58 | 3  |                            |
| AW357825  | EST                                                          | 2.58 | 10 |                            |
| AA446434  | EST                                                          | 2.58 | 10 |                            |
| AW461814  | EST                                                          | 2.60 | 12 |                            |
| AW307679  | EST                                                          | 2.60 | 6  |                            |
| AF147330  | Homo sapiens clone YB24C12.                                  | 2.60 | 3  |                            |
| L20216    | Cercopithecus aethiops UV-damaged DNA-binding protein 127    | 2.60 | 3  | Apoptosis & Cell cycle     |
| NM_000991 | Homo sapiens ribosomal protein L28 (RPL28)                   | 2.60 | 12 | Ribosomal                  |
| X69084    | Bos taurus beta 2-microglobulin                              | 2.62 | 6  | Cytokine family            |
| Z25531    | Bos taurus repeat region DNA                                 | 2.62 | 3  |                            |
| AA453356  | EST                                                          | 2.62 | 3  |                            |
| AW345186  | EST                                                          | 2.62 | 12 |                            |
| AW356197  | EST                                                          | 2.62 | 11 |                            |
| BP112762  | EST                                                          | 2.64 | 10 |                            |
| AW464239  | EST                                                          | 2.64 | 6  |                            |
| U76713    | Homo sapiens apobec-1 binding protein 1                      | 2.64 | 8  |                            |
| AW462171  | EST                                                          | 2.65 | 9  |                            |
| AW464849  | EST                                                          | 2.66 | 10 |                            |
| AW485419  | EST                                                          | 2.66 | 3  |                            |
| AW312796  | EST                                                          | 2.66 | 8  |                            |
| BP108284  | EST                                                          | 2.67 | 12 |                            |
| AF131745  | Homo sapiens clone 25110                                     | 2.67 | 12 |                            |
| AW425519  | EST                                                          | 2.67 | 12 |                            |

|           |                                                              |      |    |                            |
|-----------|--------------------------------------------------------------|------|----|----------------------------|
| AW307760  | EST                                                          | 2.68 | 2  |                            |
| BP111676  | EST                                                          | 2.68 | 10 |                            |
| BP108499  | EST                                                          | 2.69 | 9  |                            |
| AW463647  | EST                                                          | 2.70 | 12 |                            |
| A1797064  | EST                                                          | 2.70 | 2  |                            |
| X74070    | Homo sapiens BTF 3                                           | 2.70 | 3  | Transcriptional regulator  |
| AW426436  | EST                                                          | 2.70 | 12 |                            |
| A1815375  | EST                                                          | 2.71 | 2  |                            |
| AW461482  | EST                                                          | 2.71 | 10 |                            |
| AF102850  | Homo sapiens dolichyl-phosphate beta-glucosyltransferase     | 2.72 | 2  | Enzyme                     |
| AW462512  | EST                                                          | 2.72 | 12 |                            |
| L34015    | Bos taurus cytochrome c oxidase subunit IV                   | 2.72 | 12 | Enzyme                     |
| BP111358  | EST                                                          | 2.73 | 10 |                            |
| AW163018  | EST                                                          | 2.73 | 12 |                            |
| H27490    | EST                                                          | 2.73 | 10 |                            |
| AW315250  | EST                                                          | 2.74 | 10 |                            |
| AW463583  | EST                                                          | 2.74 | 9  |                            |
| A1353306  | EST                                                          | 2.74 | 6  |                            |
| NM_006402 | Homo sapiens hepatitis B virus x-interacting protein         | 2.75 | 10 | Oncogene & Tumor inhibitor |
| AW428553  | EST                                                          | 2.75 | 12 |                            |
| BP109933  | EST                                                          | 2.75 | 12 |                            |
| AW315651  | EST                                                          | 2.76 | 12 |                            |
| AW298937  | EST                                                          | 2.76 | 7  |                            |
| AF092565  | Homo sapiens splicing factor Prp8                            | 2.76 | 6  | Transcriptional regulator  |
| X82879    | Artificial sequences DNA for ART 2                           | 2.76 | 2  |                            |
| AW432050  | EST                                                          | 2.76 | 9  |                            |
| J03835    | Bos taurus proteolipid protein of the H <sup>+</sup> -ATPase | 2.77 | 8  | Enzyme                     |
| BP111391  | EST                                                          | 2.77 | 10 |                            |
| NM_003651 | Homo sapiens cold shock domain protein A (CSDA)              | 2.78 | 8  | Heat shock protein         |
| NM_002130 | Homo sapiens HMGCS1                                          | 2.78 | 6  | Enzyme                     |
| AJ009770  | Homo sapiens putative transcription factor                   | 2.79 | 10 | Transcriptional regulator  |
| BP112564  | EST                                                          | 2.79 | 6  |                            |
| D86562    | Sus scrofa DAD1                                              | 2.79 | 6  | Apoptosis & Cell cycle     |
| D23660    | Homo sapiens ribosomal protein                               | 2.79 | 6  | Ribosomal                  |
| AB003093  | Bos taurus ferritin H subunit                                | 2.79 | 8  |                            |
| AW416500  | EST                                                          | 2.79 | 2  |                            |
| M75099    | Homo sapiens rapamycin- and FK506-binding protein            | 2.79 | 6  |                            |
| NM_003130 | Homo sapiens sorcin (SRI)                                    | 2.79 | 3  | ECM & related              |
| BP109321  | EST                                                          | 2.80 | 10 |                            |
| AW345511  | EST                                                          | 2.80 | 9  |                            |
| NM_002916 | Homo sapiens replication factor C 4                          | 2.81 | 12 | DNA binding protein        |
| NM_012245 | Homo sapiens SKI-interacting protein (SNW1)                  | 2.81 | 7  |                            |
| BP111625  | EST                                                          | 2.82 | 12 |                            |
| BP109513  | EST                                                          | 2.82 | 10 |                            |
| AF054502  | Homo sapiens clone IMAGE Consortium 302831                   | 2.82 | 3  | Cytokine family            |
| U84139    | Bos taurus structure-specific recognition protein 1 (SSRP1)  | 2.83 | 6  |                            |
| NM_006704 | Homo sapiens suppressor of G2 allele of SKP1                 | 2.84 | 12 |                            |
| X74728    | O.cuniculus elongation factor 1 beta                         | 2.84 | 6  | Transcriptional regulator  |
| A1929021  | EST                                                          | 2.84 | 9  |                            |
| AB017534  | Bos taurus phospholipid hydroperoxide glutathione peroxidase | 2.85 | 9  | Enzyme                     |
| X60212    | Rattus norvegicus ASI                                        | 2.85 | 6  | Ribosomal                  |
| Z33621    | Bos taurus SVSP109                                           | 2.87 | 2  |                            |
| AW479239  | EST                                                          | 2.87 | 10 |                            |
| NM_002574 | Homo sapiens proliferation-associated gene A                 | 2.87 | 6  | Oncogene & Tumor inhibitor |
| AW241997  | EST                                                          | 2.87 | 2  |                            |
| AB015343  | Homo sapiens HRHFB2122                                       | 2.88 | 2  |                            |
| BP109738  | EST                                                          | 2.88 | 7  |                            |
| NM_002809 | Homo sapiens PSMD3                                           | 2.89 | 12 |                            |
| AW353298  | EST                                                          | 2.90 | 6  |                            |
| AW354990  | EST                                                          | 2.90 | 8  |                            |
| AW487044  | EST                                                          | 2.90 | 9  |                            |
| AW464852  | EST                                                          | 2.91 | 9  |                            |
| BP112712  | EST                                                          | 2.91 | 2  |                            |
| AF057691  | Mus musculus HMG box transcription factor (TCF-3)            | 2.91 | 7  | Transcriptional regulator  |
| AJ243656  | Methanobacterium thermoautotrophicum ehbA-Q                  | 2.93 | 2  |                            |
| AW345995  | EST                                                          | 2.94 | 10 |                            |
| BP111696  | EST                                                          | 2.94 | 7  |                            |
| BP109363  | EST                                                          | 2.95 | 12 |                            |
| BP108346  | EST                                                          | 2.95 | 7  |                            |
| AF205890  | Homo sapiens disabled-2                                      | 2.96 | 9  |                            |
| AW426723  | EST                                                          | 2.96 | 12 |                            |
| F22918    | EST                                                          | 2.98 | 3  |                            |
| AW462829  | EST                                                          | 2.99 | 9  |                            |
| AW314100  | EST                                                          | 3.00 | 10 |                            |
| AW477939  | EST                                                          | 3.00 | 4  |                            |
| AF172447  | Mus musculus afadin                                          | 3.01 | 7  | Cell adhesion              |
| L32610    | Homo sapiens ribonucleoprotein                               | 3.01 | 7  | Nuclear protein            |
| AW415718  | EST                                                          | 3.01 | 3  |                            |
| NM_003131 | Homo sapiens serum response factor (SRF)                     | 3.01 | 10 | Transcriptional regulator  |
| AJ132772  | Bos taurus futb and r1f                                      | 3.01 | 6  |                            |
| AB027196  | Homo sapiens RIE2 sid2705                                    | 3.02 | 10 |                            |
| U89439    | Bos taurus ubiquitin-like protein                            | 3.02 | 10 | Heat shock protein         |
| AW157835  | EST                                                          | 3.02 | 2  |                            |
| AW428010  | EST                                                          | 3.02 | 10 |                            |
| AF143815  | Bos taurus ribosomal protein (QM)                            | 3.02 | 12 | Ribosomal                  |
| BP107805  | EST                                                          | 3.03 | 10 |                            |
| A1816672  | EST                                                          | 3.03 | 6  |                            |
| X85799    | Bos taurus clone TUS4                                        | 3.03 | 2  |                            |
| BP112769  | EST                                                          | 3.04 | 7  |                            |
| A1681434  | EST                                                          | 3.04 | 10 |                            |
| NM_002799 | Homo sapiens PSMB7                                           | 3.04 | 10 |                            |
| AF113682  | Homo sapiens clone FLB3436 PRO0868 mRNA, complete cds        | 3.04 | 4  |                            |
| AW194656  | EST                                                          | 3.04 | 2  |                            |
| AF094481  | Homo sapiens p20-CGGBP                                       | 3.04 | 6  | DNA binding protein        |
| BP112290  | EST                                                          | 3.05 | 10 |                            |
| Y16849    | Thermobacillus xylanilyticus xynA and abfA                   | 3.05 | 2  |                            |
| AW358489  | EST                                                          | 3.06 | 12 |                            |
| AW357737  | EST                                                          | 3.06 | 3  |                            |
| AF017178  | Homo sapiens pro alpha 1(I) collagen (COL1A1)                | 3.06 | 3  | ECM & related              |
| X56649    | Bos taurus Annexin I                                         | 3.06 | 2  | Apoptosis & Cell cycle     |

|           |                                                               |      |    |                        |
|-----------|---------------------------------------------------------------|------|----|------------------------|
| NM_001003 | Homo sapiens ribosomal protein, large, P1 (RPLP1)             | 3.06 | 6  | Ribosomal              |
| D29643    | Homo sapiens KIAA0115                                         | 3.07 | 6  |                        |
| BP109528  | EST                                                           | 3.07 | 8  |                        |
| U83993    | Homo sapiens P2X4 purinoreceptor                              | 3.07 | 2  |                        |
| BP109531  | EST                                                           | 3.08 | 3  |                        |
| BP111521  | EST                                                           | 3.08 | 10 |                        |
| L00160    | Homo sapiens phosphoglycerate kinase (pgk)                    | 3.09 | 9  | Enzyme                 |
| AW427611  | EST                                                           | 3.09 | 12 |                        |
| NM_004500 | Homo sapiens heterogeneous nuclear ribonucleoprotein C        | 3.10 | 12 |                        |
| AW462084  | EST                                                           | 3.11 | 8  |                        |
| AF073839  | Rattus norvegicus bithoraxoid-like protein                    | 3.11 | 3  |                        |
| M26198    | Bos taurus ASS mRNA encoding argininosuccinate synthetase     | 3.11 | 9  | Enzyme                 |
| NM_010064 | Mus musculus Dncic2                                           | 3.12 | 3  | Cytoskelton            |
| NM_000387 | Homo sapiens solute carrier family 25                         | 3.12 | 2  | Mitochondrial          |
| AW467629  | EST                                                           | 3.12 | 9  |                        |
| M63452    | Bos taurus gamma globin and globin (PSI-2) pseudogene         | 3.12 | 12 |                        |
| AW358722  | EST                                                           | 3.13 | 10 |                        |
| BP109463  | EST                                                           | 3.14 | 6  |                        |
| U63610    | Homo sapiens plectin (PLEC1)                                  | 3.15 | 10 | Cell adhesion          |
| AW447274  | EST                                                           | 3.16 | 12 |                        |
| M15886    | Bos taurus endozepine                                         | 3.16 | 2  |                        |
| NM_006817 | Homo sapiens endoplasmic reticulum luminal protein (ERP28)    | 3.17 | 12 |                        |
| AF086462  | Homo sapiens clone ZD85G07                                    | 3.17 | 3  |                        |
| AW484109  | EST                                                           | 3.17 | 12 |                        |
| AW358732  | EST                                                           | 3.18 | 8  |                        |
| AW336828  | EST                                                           | 3.18 | 9  |                        |
| S54973    | Bos taurus 20 alpha-hydroxysteroid dehydrogenase              | 3.18 | 8  | Enzyme                 |
| AF043937  | Homo sapiens DHAPAT                                           | 3.19 | 9  | Enzyme                 |
| AW242801  | EST                                                           | 3.20 | 10 |                        |
| AF144763  | Bos taurus TIMP-1                                             | 3.21 | 3  | ECM & related          |
| X82321    | Homo sapiens thiol-specific antioxidant                       | 3.22 | 6  |                        |
| X12877    | Bos taurus cytokeratin A (no. 8)                              | 3.22 | 12 | Cytoskelton            |
| AA165403  | EST                                                           | 3.23 | 9  |                        |
| AF160639  | EST                                                           | 3.23 | 10 |                        |
| AW418400  | EST                                                           | 3.24 | 12 |                        |
| BP112791  | EST                                                           | 3.24 | 6  |                        |
| BP108465  | EST                                                           | 3.24 | 7  |                        |
| AF075377  | EST                                                           | 3.25 | 10 |                        |
| AF110801  | Homo sapiens interleukin-18 binding protein c precursor       | 3.25 | 9  | Cytokine family        |
| BP109473  | EST                                                           | 3.26 | 3  |                        |
| BP112526  | EST                                                           | 3.28 | 8  |                        |
| AW247882  | EST                                                           | 3.29 | 10 |                        |
| L05093    | Homo sapiens ribosomal protein L18a                           | 3.30 | 6  | Ribosomal              |
| X63220    | Bos taurus ubiquinone oxidoreductase complex                  | 3.31 | 3  | Enzyme                 |
| AW354042  | EST                                                           | 3.31 | 12 |                        |
| NM_003144 | Homo sapiens signal sequence receptor (SSR1)                  | 3.31 | 6  |                        |
| AW315092  | EST                                                           | 3.31 | 10 |                        |
| D13630    | Homo sapiens KIAA0005                                         | 3.31 | 12 |                        |
| Z19087    | Rattus norvegicus encoding TRAP-complex delta subunit         | 3.32 | 8  | Cytokine family        |
| AT001971  | EST                                                           | 3.33 | 2  |                        |
| AW481256  | EST                                                           | 3.35 | 2  |                        |
| U02610    | Bos taurus acidic ribosomal protein P2                        | 3.35 | 6  | Ribosomal              |
| AW409892  | EST                                                           | 3.35 | 6  |                        |
| X06089    | Bos taurus mitochondrial ATP synthase d-subunit               | 3.37 | 6  | Mitochondrial          |
| M58700    | Sus scrofa ribonuclease inhibitor (RI)                        | 3.37 | 2  |                        |
| AF102243  | Odocoileus hemionus DeerC106 tetranucleotide microsatellite F | 3.37 | 2  |                        |
| AI927078  | EST                                                           | 3.37 | 12 |                        |
| AF083246  | Homo sapiens HSPC028                                          | 3.38 | 12 |                        |
| NM_003528 | Homo sapiens H2B histone family, member Q (H2BFQ)             | 3.39 | 8  | Heat shock protein     |
| AB016798  | Sus scrofa ribosomal protein L29/HIP                          | 3.39 | 12 | Ribosomal              |
| BP108368  | EST                                                           | 3.40 | 2  |                        |
| BP110498  | EST                                                           | 3.40 | 2  |                        |
| AW344407  | EST                                                           | 3.40 | 2  |                        |
| AF080067  | Oryctolagus cuniculus SMVT                                    | 3.41 | 6  |                        |
| NM_006750 | Homo sapiens syntrophin beta 2 (SNTB2)                        | 3.43 | 3  | Cell adhesion          |
| AF043735  | Bos taurus 14-3-3 epsilon                                     | 3.43 | 12 |                        |
| NM_000968 | Homo sapiens ribosomal protein L4 (RPL4)                      | 3.43 | 12 | Ribosomal              |
| BP112770  | EST                                                           | 3.44 | 3  |                        |
| BP112237  | EST                                                           | 3.45 | 6  |                        |
| AF086555  | Homo sapiens clone ZE14E04                                    | 3.45 | 3  |                        |
| BP109943  | EST                                                           | 3.46 | 3  |                        |
| X53827    | Bos taurus 70 KDa heat shock cognate protein                  | 3.46 | 6  | Heat shock protein     |
| AW425551  | EST                                                           | 3.46 | 7  |                        |
| NM_006320 | Homo sapiens PGRMC2                                           | 3.50 | 3  | Cytokine family        |
| K02300    | Rabbit muscle aldolase A                                      | 3.51 | 12 | Enzyme                 |
| AW358439  | EST                                                           | 3.52 | 9  |                        |
| X62048    | Homo sapiens Wee1 hu                                          | 3.52 | 12 | Apoptosis & Cell cycle |
| AF086313  | Homo sapiens clone ZD52B10                                    | 3.53 | 6  |                        |
| AF161464  | Homo sapiens HSPC115                                          | 3.53 | 2  |                        |
| AA933125  | EST                                                           | 3.55 | 2  |                        |
| AF123303  | Homo sapiens calcium-binding transporter                      | 3.55 | 4  |                        |
| BP109362  | EST                                                           | 3.56 | 3  |                        |
| M14056    | Bos taurus calpactin I heavy chain (p36) protein              | 3.56 | 8  | Apoptosis & Cell cycle |
| X80230    | Homo sapiens serine/threonine protein kinase                  | 3.56 | 3  | Enzyme                 |
| AW316417  | EST                                                           | 3.56 | 2  |                        |
| BP108481  | EST                                                           | 3.57 | 2  |                        |
| AW486434  | EST                                                           | 3.57 | 2  |                        |
| M64923    | Bos taurus C10 protein                                        | 3.58 | 12 |                        |
| AW316509  | EST                                                           | 3.61 | 9  |                        |
| AW464378  | EST                                                           | 3.63 | 3  |                        |
| AW479092  | EST                                                           | 3.63 | 2  |                        |
| AW336810  | EST                                                           | 3.63 | 12 |                        |
| AW463657  | EST                                                           | 3.64 | 12 |                        |
| AF161377  | Homo sapiens HSPC259                                          | 3.64 | 6  |                        |
| AW463224  | EST                                                           | 3.64 | 3  |                        |
| BP109674  | EST                                                           | 3.65 | 6  |                        |
| NM_000977 | Homo sapiens ribosomal protein L13 (RPL13)                    | 3.65 | 12 | Ribosomal              |
| X14330    | Bos taurus galactose-binding lectin                           | 3.65 | 12 | ECM & related          |
| BP110245  | EST                                                           | 3.65 | 8  |                        |
| AW345289  | EST                                                           | 3.67 | 2  |                        |

|           |                                                                  |      |    |                            |
|-----------|------------------------------------------------------------------|------|----|----------------------------|
| AW487719  | EST                                                              | 3.67 | 12 |                            |
| AF013213  | Bos taurus elongation factor 1 alpha                             | 3.67 | 8  | Transcriptional regulator  |
| AB014599  | Homo sapiens KIAA0699 protein                                    | 3.67 | 6  |                            |
| NM_001311 | Homo sapiens cysteine-rich protein 1 (CRIP1)                     | 3.68 | 9  |                            |
| M22432    | Mus musculus protein synthesis elongation factor Tu              | 3.69 | 8  | Transcriptional regulator  |
| BP111488  | EST                                                              | 3.69 | 2  |                            |
| X04853    | Bos taurus clathrin light chain b (lymphocyte LCb)               | 3.69 | 9  | Membrane protein           |
| AA188595  | EST                                                              | 3.70 | 12 |                            |
| AW336383  | EST                                                              | 3.72 | 12 |                            |
| X60195    | Ovis aries 6-phosphogluconate dehydrogenase                      | 3.73 | 6  | Enzyme                     |
| D55670    | Bos taurus thrombin inhibitor                                    | 3.75 | 3  |                            |
| BP110942  | EST                                                              | 3.76 | 2  |                            |
| AW358157  | EST                                                              | 3.77 | 10 |                            |
| AF077037  | Homo sapiens HSPC013                                             | 3.78 | 2  |                            |
| AF076786  | Oryctolagus cuniculus serum amyloid A-activating factor SAF-     | 3.78 | 10 | Cytokine family            |
| AW462855  | EST                                                              | 3.79 | 11 |                            |
| BP111660  | EST                                                              | 3.80 | 10 |                            |
| AF020513  | Bos taurus PAG-11                                                | 3.82 | 12 | Cytokine family            |
| BP107856  | EST                                                              | 3.82 | 12 |                            |
| NM_005556 | Homo sapiens keratin 7 (KRT7)                                    | 3.83 | 2  | Cytoskelton                |
| J03275    | Bos taurus ADP-ribosylation factor                               | 3.83 | 6  |                            |
| AA315083  | EST                                                              | 3.84 | 2  |                            |
| NM_001607 | Homo sapiens acetyl-Coenzyme A acyltransferase I(ACAA1)          | 3.85 | 2  | Enzyme                     |
| AW446305  | EST                                                              | 3.85 | 2  |                            |
| NM_005572 | Homo sapiens lamin A/C (LMNA)                                    | 3.86 | 3  | Cytoskelton                |
| AB017196  | Sus scrofa ACY-1 and rpL29/HIP                                   | 3.87 | 12 | Apoptosis & Cell cycle     |
| NM_002901 | Homo sapiens reticulocalbin 1, EF-hand calcium binding domai     | 3.90 | 9  |                            |
| AW425870  | EST                                                              | 3.91 | 2  |                            |
| AW425363  | EST                                                              | 3.92 | 10 |                            |
| BP108474  | EST                                                              | 3.92 | 6  |                            |
| BP110848  | EST                                                              | 3.93 | 3  |                            |
| D16235    | Bos taurus phospholipase C-alpha (PLC alpha)                     | 3.94 | 3  | Oncogene & Tumor inhibitor |
| AW462423  | EST                                                              | 3.94 | 6  |                            |
| NM_000973 | Homo sapiens ribosomal protein L8 (RPL8)                         | 3.95 | 6  | Ribosomal                  |
| AW356374  | EST                                                              | 3.96 | 12 |                            |
| A1276594  | EST                                                              | 3.96 | 3  |                            |
| AW479384  | EST                                                              | 3.97 | 2  |                            |
| AW308441  | EST                                                              | 3.98 | 2  |                            |
| M38520    | Bos taurus cytochrome-c oxidase subunit VIa-liver isoform        | 4.00 | 8  | Enzyme                     |
| AF117237  | Homo sapiens prefoldin subunit 2                                 | 4.00 | 3  |                            |
| Z48478    | Bos taurus C-type natriuretic peptide                            | 4.02 | 2  |                            |
| AW485951  | EST                                                              | 4.04 | 12 |                            |
| BP107836  | EST                                                              | 4.04 | 11 |                            |
| NM_003720 | Homo sapiens down syndrome critical region gene 2 (DSCR2)        | 4.04 | 3  | DNA binding protein        |
| L07919    | Homo sapiens homeodomain protein DLX-2                           | 4.05 | 2  | Transcriptional regulator  |
| AW465337  | EST                                                              | 4.05 | 9  |                            |
| AF124819  | Homo sapiens T84 colon carcinoma cell IL-1beta                   | 4.06 | 2  | Cytokine family            |
| U46064    | Sus scrofa aldehyde reductase (ALR1)                             | 4.11 | 3  | Enzyme                     |
| AF086467  | Homo sapiens clone ZD86G12                                       | 4.13 | 12 |                            |
| NM_003746 | Homo sapiens dynein, cytoplasmic, light polypeptide (PIN)        | 4.15 | 12 | Cytoskelton                |
| M81129    | Bos taurus superoxide dismutase                                  | 4.15 | 12 | Enzyme                     |
| NM_002634 | Homo sapiens prohibitin (PHB)                                    | 4.15 | 3  | Oncogene & Tumor inhibitor |
| AW326193  | EST                                                              | 4.17 | 2  |                            |
| Y09537    | Sus scrofa beta-1,2-N-acetylglucosaminyltransferase II           | 4.19 | 2  | Enzyme                     |
| M33269    | Bos taurus PRP-IV                                                | 4.19 | 3  | Cytokine family            |
| BP111704  | EST                                                              | 4.19 | 6  |                            |
| NM_004427 | Homo sapiens early development regulator 2 (EDR2)                | 4.20 | 2  |                            |
| D89060    | Homo sapiens oligosaccharyltransferase                           | 4.21 | 6  | Enzyme                     |
| BP111331  | EST                                                              | 4.22 | 3  |                            |
| NM_001960 | Homo sapiens eukaryotic translation elongation factor 1 delta (E | 4.22 | 2  | Transcriptional regulator  |
| AW416539  | EST                                                              | 4.23 | 2  |                            |
| AF003998  | Rattus norvegicus Golgi SNARE GS15                               | 4.24 | 2  |                            |
| BP107685  | EST                                                              | 4.27 | 6  |                            |
| AJ010842  | Homo sapiens putative ATP(GTP)-binding protein                   | 4.29 | 9  |                            |
| BP112697  | EST                                                              | 4.29 | 3  |                            |
| BP108905  | EST                                                              | 4.35 | 1  |                            |
| F22997    | EST                                                              | 4.37 | 12 |                            |
| AW463719  | EST                                                              | 4.38 | 2  |                            |
| NM_006705 | Homo sapiens GADD45G                                             | 4.42 | 2  |                            |
| BP112902  | EST                                                              | 4.43 | 12 |                            |
| AW431699  | EST                                                              | 4.44 | 3  |                            |
| AW464645  | EST                                                              | 4.44 | 3  |                            |
| NM_007065 | Homo sapiens CDC37 cell division cycle 37 homolog                | 4.45 | 3  | Apoptosis & Cell cycle     |
| AB015610  | Chlorocebus aethiops ribosomal protein S4X                       | 4.46 | 6  | Ribosomal                  |
| BP108150  | EST                                                              | 4.46 | 2  |                            |
| AJ249625  | Paracentrotus lividus Chaperonin (hsp60)                         | 4.48 | 3  | Heat shock protein         |
| NM_001101 | Homo sapiens actin beta (ACTB)                                   | 4.50 | 12 | Cytoskelton                |
| AW382042  | EST                                                              | 4.50 | 3  |                            |
| A1097036  | EST                                                              | 4.50 | 3  |                            |
| AW479403  | EST                                                              | 4.54 | 12 |                            |
| AL035448  | EST                                                              | 4.55 | 2  |                            |
| AW462223  | EST                                                              | 4.55 | 3  |                            |
| U95040    | Homo sapiens transcriptional corepressor hKAP1/TIF1B             | 4.55 | 12 | Transcriptional regulator  |
| AW347614  | EST                                                              | 4.57 | 3  |                            |
| AF195417  | Homo sapiens DEAD-box protein abstrakt (ABS)                     | 4.60 | 2  |                            |
| U71273    | Sus scrofa glucosidase II                                        | 4.61 | 6  | Enzyme                     |
| AW314897  | EST                                                              | 4.62 | 12 |                            |
| AW298879  | EST                                                              | 4.66 | 6  |                            |
| U16336    | Bos taurus cathepsin B                                           | 4.70 | 6  | Oncogene & Tumor inhibitor |
| AF027200  | Bos taurus ROS-GC1                                               | 4.73 | 6  | Enzyme                     |
| AW411242  | EST                                                              | 4.76 | 3  |                            |
| AW445836  | EST                                                              | 4.76 | 3  |                            |
| AW483923  | EST                                                              | 4.76 | 3  |                            |
| BP107868  | EST                                                              | 4.76 | 2  |                            |
| AF197060  | Homo sapiens HIP-55                                              | 4.77 | 12 |                            |
| NM_003969 | Homo sapiens ubiquitin-conjugating enzyme E2M (UBE2M)            | 4.78 | 2  | Heat shock protein         |
| AW427732  | EST                                                              | 4.81 | 3  |                            |
| AW195100  | EST                                                              | 4.83 | 2  |                            |
| M59755    | Bos taurus llens aldose reductase pseudogene                     | 4.85 | 6  |                            |
| AF083441  | Homo sapiens SU11 isolog                                         | 4.85 | 12 | Transcriptional regulator  |

|           |                                                                  |       |    |                            |
|-----------|------------------------------------------------------------------|-------|----|----------------------------|
| BP109437  | EST                                                              | 4.85  | 9  |                            |
| AW069622  | EST                                                              | 4.86  | 3  |                            |
| NM_005801 | Homo sapiens putative translation initiation factor (SUI1)       | 4.90  | 6  | Transcriptional regulator  |
| X51897    | Rabbit histone H3.3A                                             | 4.90  | 3  | Heat shock protein         |
| AW461482  | EST                                                              | 4.91  | 2  |                            |
| M17596    | Bos taurus protein disulfide isomerase (PDI)                     | 4.93  | 3  | Enzyme                     |
| Z11531    | Homo sapiens elongation factor-1-gamma                           | 4.94  | 12 | Transcriptional regulator  |
| AW445525  | EST                                                              | 4.98  | 2  |                            |
| BP112748  | EST                                                              | 5.04  | 8  |                            |
| AW462183  | EST                                                              | 5.08  | 3  |                            |
| NM_000979 | Homo sapiens ribosomal protein L18 (RPL18)                       | 5.11  | 12 | Ribosomal                  |
| NM_004428 | Homo sapiens ephrin-A1 (EFNA1)                                   | 5.14  | 3  |                            |
| M16464    | Bos taurus calpactin I light chain (p11)                         | 5.15  | 12 | Cytoskelton                |
| AW425813  | EST                                                              | 5.22  | 2  |                            |
| X72756    | Bos taurus bt betaprime cop                                      | 5.22  | 2  |                            |
| J05201    | Bos taurus liver cytochrome c oxidase subunit CIX (VIII)         | 5.23  | 12 | Enzyme                     |
| BP111688  | EST                                                              | 5.24  | 12 |                            |
| AB017335  | Homo sapiens KNSL4 and MAZ                                       | 5.30  | 2  | Apoptosis & Cell cycle     |
| AW462552  | EST                                                              | 5.31  | 12 |                            |
| BP111710  | EST                                                              | 5.32  | 3  |                            |
| AW359131  | EST                                                              | 5.33  | 3  |                            |
| AW470246  | EST                                                              | 5.37  | 12 |                            |
| M55409    | Homo sapiens pancreatic tumor-related protein                    | 5.43  | 6  | Oncogene & Tumor inhibitor |
| BP107769  | EST                                                              | 5.46  | 3  |                            |
| AF033096  | Avena sativa nonphototropic hypocotyl 1 (NPH1-1)                 | 5.47  | 12 |                            |
| W89611    | EST                                                              | 5.50  | 2  |                            |
| AF112202  | Homo sapiens prenylated rab acceptor 1                           | 5.51  | 3  |                            |
| NM_001985 | Homo sapiens electron-transfer-flavoprotein, beta polypeptide (  | 5.51  | 12 |                            |
| NM_001747 | Homo sapiens capping protein (actin filament), gelsolin-like (C. | 5.53  | 2  | Cytoskelton                |
| NM_002949 | Homo sapiens ribosomal protein L12 (MRPL12)                      | 5.57  | 2  | Ribosomal                  |
| BP111636  | EST                                                              | 5.69  | 9  |                            |
| S65367    | Bos taurus leucine aminopeptidase                                | 5.70  | 2  | Enzyme                     |
| NM_012198 | Homo sapiens grancalcin (GCL)                                    | 5.71  | 3  |                            |
| NM_000210 | Homo sapiens integrin, alpha 6 (ITGA6)                           | 5.74  | 3  | Cell adhesion              |
| S45392    | Rats heat shock protein 90                                       | 5.84  | 6  | Heat shock protein         |
| X74191    | Bos taurus microsatellite DNA INRA165                            | 5.85  | 2  |                            |
| U41668    | Homo sapiens deoxyguanosine kinase                               | 5.89  | 3  | Enzyme                     |
| AW314471  | EST                                                              | 5.91  | 3  |                            |
| AW482128  | EST                                                              | 5.94  | 12 |                            |
| AW410172  | EST                                                              | 5.98  | 12 |                            |
| NM_004393 | Homo sapiens dystroglycan 1 (DAG1)                               | 6.00  | 12 | Cell adhesion              |
| BP109730  | EST                                                              | 6.01  | 2  |                            |
| NM_006397 | Homo sapiens ribonuclease HI, large subunit (RNASEHI)            | 6.05  | 3  | Enzyme                     |
| U47101    | Homo sapiens NiR-like protein (hNiR)                             | 6.12  | 3  |                            |
| AW462425  | EST                                                              | 6.13  | 3  |                            |
| L06075    | Bos taurus cathepsin B                                           | 6.16  | 2  | Oncogene & Tumor inhibitor |
| AF034607  | Homo sapiens chloride channel ABP                                | 6.19  | 8  | Membrane protein           |
| AW314471  | EST                                                              | 6.20  | 3  |                            |
| AW464605  | EST                                                              | 6.25  | 12 |                            |
| X04851    | Bos taurus clathrin light chain a (lymphocyte LCa)               | 6.27  | 12 | Membrane protein           |
| AL049976  | Homo sapiens DKFZp564B042                                        | 6.28  | 12 |                            |
| U01946    | Ovis aries secretory protein                                     | 6.29  | 12 |                            |
| M83104    | Bos taurus cytochrome b5 reductase                               | 6.36  | 2  | Enzyme                     |
| AW465150  | EST                                                              | 6.37  | 12 |                            |
| NM_001273 | Homo sapiens CHD4                                                | 6.43  | 12 |                            |
| AW431917  | EST                                                              | 6.45  | 12 |                            |
| AW464536  | EST                                                              | 6.52  | 5  |                            |
| AJ000039  | Bos taurus glyceraldehyde 3-phosphate dehydrogenase              | 6.57  | 12 | Enzyme                     |
| AW356414  | EST                                                              | 6.64  | 3  |                            |
| X04152    | Bos taurus cytokeratin 19                                        | 6.67  | 3  | Cytoskelton                |
| NM_012193 | Homo sapiens frizzled homolog 4 (Drosophila) (FZD4)              | 6.78  | 2  |                            |
| D14073    | Bos taurus cyclophilin B                                         | 6.78  | 3  |                            |
| AW316336  | EST                                                              | 6.79  | 3  |                            |
| BP112760  | EST                                                              | 6.82  | 12 |                            |
| AW383166  | EST                                                              | 6.84  | 2  |                            |
| AW482335  | EST                                                              | 6.87  | 12 |                            |
| NM_011072 | Mus musculus profilin 1 (Pfn1)                                   | 6.94  | 3  | Cytoskelton                |
| Y09206    | Bos taurus MHC class I protein molecule D18.2                    | 6.96  | 2  | Cytokine family            |
| Z24725    | Homo sapiens mitogen inducible gene mig-2                        | 6.97  | 3  | Apoptosis & Cell cycle     |
| U21661    | Rattus norvegicus myotrophin                                     | 7.06  | 2  | Cytokine family            |
| AF020510  | Bos taurus PAG-8                                                 | 7.07  | 3  | Cytokine family            |
| NM_007192 | Homo sapiens FACTP140                                            | 7.23  | 6  | Transcriptional regulator  |
| S57412    | Rabbits protein phosphatase X                                    | 7.24  | 2  | Enzyme                     |
| X16312    | Homo sapiens phosphatase/casein kinase II beta subunit           | 7.30  | 12 | Enzyme                     |
| AW402107  | EST                                                              | 7.35  | 3  |                            |
| NM_001416 | Homo sapiens EIF4A1                                              | 7.36  | 12 | Transcriptional regulator  |
| AF015767  | Homo sapiens brain and reproductive organ-expressed protein      | 7.36  | 3  |                            |
| BP112940  | EST                                                              | 7.45  | 3  |                            |
| M21044    | Bos taurus MHC class I BoLA                                      | 7.65  | 2  | Cytokine family            |
| NM_007317 | Homo sapiens kinesin-like 4 (KNSL4)                              | 7.66  | 2  |                            |
| AW465477  | EST                                                              | 7.67  | 12 |                            |
| AW427436  | EST                                                              | 7.76  | 12 |                            |
| AW327928  | EST                                                              | 7.82  | 12 |                            |
| AF182001  | Bos taurus D4-GDP-dissociation inhibitor (D4-GDI)                | 7.82  | 3  |                            |
| AW307840  | EST                                                              | 7.86  | 3  |                            |
| AW465056  | EST                                                              | 7.88  | 3  |                            |
| X56597    | Homo sapiens humFib fibrillarlin                                 | 7.97  | 12 |                            |
| AW356736  | EST                                                              | 8.00  | 2  |                            |
| AW353230  | EST                                                              | 8.01  | 3  |                            |
| AF207664  | Homo sapiens matrix metalloprotease (ADAMTS1)                    | 8.03  | 3  | ECM & related              |
| X01809    | Bos taurus cathepsin 3' terminus                                 | 8.08  | 12 | Oncogene & Tumor inhibitor |
| NM_005022 | Homo sapiens profilin 1 (PFN1)                                   | 8.09  | 12 | Cytoskelton                |
| NM_002436 | Homo sapiens membrane protein, palmitoylated I (55kD)            | 8.33  | 12 | Membrane protein           |
| X13684    | Bos taurus glutathione peroxidase (gpx1)                         | 8.39  | 3  | Enzyme                     |
| X56503    | Sus scrofa casein kinase II beta subunit (CKII beta)             | 8.55  | 12 | Enzyme                     |
| BP112768  | EST                                                              | 9.33  | 12 |                            |
| AB003094  | Bos taurus ferritin L subunit                                    | 9.38  | 12 |                            |
| AW345567  | EST                                                              | 9.38  | 12 |                            |
| NM_001404 | Homo sapiens EEF1G                                               | 9.43  | 12 | Transcriptional regulator  |
| NM_005720 | Homo sapiens ARPC1B                                              | 9.45  | 3  | Cytoskelton                |
| AW486080  | EST                                                              | 9.52  | 12 |                            |
| AF217197  | Homo sapiens FBP interacting repressor (FIR)                     | 9.80  | 12 | Transcriptional regulator  |
| X89984    | Homo sapiens BCL7A protein                                       | 10.31 | 12 | Cytoskelton                |
| NM_000365 | Homo sapiens triosephosphate isomerase 1 (TPI1)                  | 10.52 | 12 |                            |
| AF000137  | Bos taurus connective tissue growth factor precursor (CTGF)      | 12.18 | 12 | Cytokine family            |
| NM_004494 | Homo sapiens hepatoma-derived growth factor (HDGF)               | 13.52 | 12 | Oncogene & Tumor inhibitor |
| AB009282  | Homo sapiens mRNA for cytochrome b5                              | 16.48 | 12 |                            |
| Z71872    | EST                                                              | 18.60 | 12 |                            |
| BP111694  | EST                                                              | 20.40 | 12 |                            |
| BP109950  | EST                                                              | 21.55 | 12 |                            |
| X14926    | Mus musculus calreticulin                                        | 24.00 | 12 |                            |

**Supplement Table 2**

Two-fold differentially expressed genes between Day 14E vs Day 21E.

| Accession#                                    | Gene name                                                     | D21E/D14E k-means | classification               |
|-----------------------------------------------|---------------------------------------------------------------|-------------------|------------------------------|
| Day 21E /Day 14E down-regulated genes (< 0.5) |                                                               |                   |                              |
| U21661                                        | Rattus norvegicus myotrophin                                  | 0.28              | 2 Cytokine family            |
| AW466068                                      | EST                                                           | 0.40              | 8                            |
| Day 21E /Day 14E up-regulated genes (2 <)     |                                                               |                   |                              |
| NM_000969                                     | Homo sapiens ribosomal protein L5 (RPL5)                      | 2.00              | 6 Ribosomal                  |
| AW426758                                      | EST                                                           | 2.00              | 7                            |
| AP000520                                      | Homo sapiens chromosome 6p21.3, HLA Class I region            | 2.01              | 7                            |
| NM_001145                                     | Homo sapiens RNase A family 5 (ANG)                           | 2.01              | 10 Enzyme                    |
| NM_004374                                     | Homo sapiens cytochrome c oxidase subunit VIc (COX6C)         | 2.01              | 8 Mitochondrial              |
| NM_002300                                     | Homo sapiens lactate dehydrogenase B (LDHB)                   | 2.01              | 6 Enzyme                     |
| AW461482                                      | EST                                                           | 2.01              | 10                           |
| U87641                                        | Bos taurus clone J9 mitochondrial D-loop                      | 2.01              | 8 Mitochondrial              |
| AW466029                                      | EST                                                           | 2.02              | 5                            |
| AW479049                                      | EST                                                           | 2.02              | 7                            |
| AW312796                                      | EST                                                           | 2.02              | 8                            |
| X59693                                        | Bos taurus ubiquinol-cytochrome-c reductase (subunit II)      | 2.02              | 6 Enzyme                     |
| BP112760                                      | EST                                                           | 2.03              | 12                           |
| X79866                                        | Bos taurus VIa L                                              | 2.03              | 4                            |
| AF161388                                      | Homo sapiens HSPC270                                          | 2.03              | 8                            |
| AW242801                                      | EST                                                           | 2.03              | 10                           |
| AF225959                                      | Mus musculus adhesion regulating molecule ARM-1               | 2.03              | 7 Cell adhesion              |
| BP109543                                      | EST                                                           | 2.03              | 5                            |
| Y10811                                        | Bos taurus precystatin C                                      | 2.03              | 9 Oncogene & Tumor inhibitor |
| BP109609                                      | EST                                                           | 2.04              | 9                            |
| BP112289                                      | EST                                                           | 2.04              | 7                            |
| BP112061                                      | EST                                                           | 2.04              | 6                            |
| NM_006676                                     | Homo sapiens ubiquitin specific protease 20 (USP20)           | 2.05              | 10 Enzyme                    |
| NM_002898                                     | Homo sapiens single stranded interacting protein 2 (RBMS2)    | 2.05              | 5 RNA binding protein        |
| BP107876                                      | EST                                                           | 2.05              | 4                            |
| AW353438                                      | EST                                                           | 2.05              | 7                            |
| NM_004663                                     | Homo sapiens RAB11A                                           | 2.05              | 4 Oncogene & Tumor inhibitor |
| AW336350                                      | EST                                                           | 2.05              | 7                            |
| BP111676                                      | EST                                                           | 2.06              | 10                           |
| M83656                                        | Bos taurus cytoplasmic phosphotyrosyl protein phosphatase     | 2.06              | 9 Enzyme                     |
| BP107831                                      | EST                                                           | 2.06              | 3                            |
| AF102243                                      | Odocoileus hemionus DeerC106 tetranucleotide microsatellite F | 2.06              | 2                            |
| BP111076                                      | EST                                                           | 2.06              | 7                            |
| NM_000978                                     | Homo sapiens ribosomal protein L23 (RPL23)                    | 2.06              | 6 Ribosomal                  |
| AW432050                                      | EST                                                           | 2.06              | 9                            |
| H44982                                        | EST                                                           | 2.07              | 10                           |
| NM_006704                                     | Homo sapiens suppressor of G2 allele of SKP1                  | 2.07              | 12                           |
| AW464570                                      | EST                                                           | 2.07              | 3                            |
| BP108869                                      | EST                                                           | 2.07              | 7                            |
| AW465337                                      | EST                                                           | 2.07              | 9                            |
| NM_012383                                     | Homo sapiens osteoclast stimulating factor 1 (OSTF1)          | 2.07              | 11                           |
| AJ243486                                      | Cyprinus carpio uncoupling protein 2 (UCP2)                   | 2.08              | 7                            |
| D12816                                        | Bos taurus actin2                                             | 2.08              | 5 Cytoskelton                |
| S68400                                        | Bos taurus elongation factor 2 3'-noncoding region homolog    | 2.09              | 6 Transcriptional regulator  |
| X91895                                        | Bos taurus PAS-6 and PAS-7 protein                            | 2.09              | 4 ECM & related              |
| AW463657                                      | EST                                                           | 2.09              | 12                           |
| BP110521                                      | EST                                                           | 2.09              | 4                            |
| BP111435                                      | EST                                                           | 2.09              | 10                           |
| M63452                                        | Bos taurus gamma globin and globin (PSI-2) pseudogene         | 2.10              | 12                           |
| AW484739                                      | EST                                                           | 2.10              | 4                            |
| AW461352                                      | EST                                                           | 2.10              | 5                            |
| AW462855                                      | EST                                                           | 2.10              | 11                           |
| BP108349                                      | EST                                                           | 2.10              | 7                            |
| U58682                                        | Homo sapiens ribosomal protein S28                            | 2.10              | 6 Ribosomal                  |
| AW354042                                      | EST                                                           | 2.11              | 12                           |
| AW403893                                      | EST                                                           | 2.11              | 10                           |
| AW445836                                      | EST                                                           | 2.11              | 3                            |
| BP110241                                      | EST                                                           | 2.12              | 6                            |
| AW487793                                      | EST                                                           | 2.13              | 7                            |
| NM_009081                                     | Mus musculus ribosomal protein L28 (Rpl28)                    | 2.13              | 4 Ribosomal                  |
| NM_004143                                     | Homo sapiens melanocyte specific gene 1 (MSG1)                | 2.13              | 7 Cytoskelton                |
| BP110294                                      | EST                                                           | 2.13              | 8                            |
| BP108499                                      | EST                                                           | 2.14              | 9                            |
| AW354303                                      | EST                                                           | 2.14              | 8                            |
| AF205890                                      | Homo sapiens disabled-2                                       | 2.14              | 9                            |
| AJ000518                                      | Bos taurus BS                                                 | 2.14              | 8                            |
| AW477773                                      | EST                                                           | 2.14              | 10                           |
| BP106819                                      | EST                                                           | 2.14              | 9                            |
| AF202922                                      | Homo sapiens LRP16                                            | 2.14              | 10                           |
| X99909                                        | Canus sp. ribosomal protein L4                                | 2.14              | 8 Ribosomal                  |
| S70448                                        | Bos taurus F1Fo-ATP synthase complex Fo membrane domain       | 2.15              | 8 Enzyme                     |
| AF195022                                      | Bos taurus mucin                                              | 2.15              | 9 Cell adhesion              |
| NM_003011                                     | Homo sapiens SET translocation                                | 2.15              | 7                            |
| BP108322                                      | EST                                                           | 2.15              | 10                           |
| X53553                                        | Bos taurus insulin-like growth factor II (IGF-II)             | 2.16              | 10 Cytokine family           |
| V01270                                        | Rattus norvegicus 18S, 5.8S, and 28S ribosomal RNAs           | 2.16              | 3                            |
| M62428                                        | Bos taurus polyubiquitin                                      | 2.16              | 7 Heat shock protein         |
| AW069622                                      | EST                                                           | 2.17              | 3                            |
| AW445452                                      | EST                                                           | 2.17              | 7                            |
| AA615941                                      | EST                                                           | 2.17              | 10                           |
| AW427810                                      | EST                                                           | 2.17              | 10                           |
| AW314057                                      | EST                                                           | 2.18              | 9                            |
| M13214                                        | Bos taurus galactosyltransferase                              | 2.19              | 7 Enzyme                     |
| U11927                                        | Bos gaurus vacuolar H-ATPase subunit D (VATD)                 | 2.19              | 10 Enzyme                    |
| U83076                                        | EST                                                           | 2.19              | 4                            |
| AW130325                                      | EST                                                           | 2.19              | 4                            |
| AW345491                                      | EST                                                           | 2.19              | 8                            |
| BP111440                                      | EST                                                           | 2.19              | 9                            |
| AF086555                                      | Homo sapiens clone ZE14E04                                    | 2.19              | 3                            |
| NM_001010                                     | Homo sapiens ribosomal protein S6 (RPS6)                      | 2.19              | 8 Ribosomal                  |
| NM_006496                                     | Homo sapiens GNAI3                                            | 2.20              | 8 DNA binding protein        |
| AW345589                                      | EST                                                           | 2.20              | 10                           |
| AF181462                                      | Bos taurus Dlk                                                | 2.21              | 8                            |



|           |                                                             |      |    |                            |
|-----------|-------------------------------------------------------------|------|----|----------------------------|
| BP107512  | EST                                                         | 2.21 | 4  |                            |
| X06088    | Bos taurus mitochondrial ATP synthase b-subunit             | 2.21 | 8  | Mitochondrial              |
| NM_001827 | Homo sapiens CDC28 protein kinase 2 (CKS2)                  | 2.23 | 8  | Apoptosis & Cell cycle     |
| AW437662  | EST                                                         | 2.24 | 10 |                            |
| M27239    | Bos taurus PRP-II                                           | 2.24 | 11 | Cytokine family            |
| BP108218  | EST                                                         | 2.24 | 9  |                            |
| BP107462  | EST                                                         | 2.25 | 6  |                            |
| BP110830  | EST                                                         | 2.25 | 8  |                            |
| BP106906  | EST                                                         | 2.25 | 8  |                            |
| NM_003369 | Homo sapiens UV radiation resistance associated             | 2.26 | 10 | Apoptosis & Cell cycle     |
| BP109619  | EST                                                         | 2.26 | 4  |                            |
| X13698    | Bos taurus ribonucleoprotein SS-B/La                        | 2.26 | 10 | Nuclear protein            |
| NM_005868 | Homo sapiens BET1                                           | 2.27 | 6  | Membrane protein           |
| AF161393  | Homo sapiens HSPC275                                        | 2.27 | 10 |                            |
| D55670    | Bos taurus thrombin inhibitor                               | 2.28 | 3  |                            |
| NM_000291 | Homo sapiens phosphoglycerate kinase 1 (PGK1)               | 2.28 | 10 | Enzyme                     |
| AW464024  | EST                                                         | 2.28 | 5  |                            |
| AW357737  | EST                                                         | 2.29 | 3  |                            |
| BP109708  | EST                                                         | 2.29 | 9  |                            |
| NM_003011 | Homo sapiens SET translocation                              | 2.29 | 10 |                            |
| AW463583  | EST                                                         | 2.29 | 9  |                            |
| NM_005572 | Homo sapiens lamin A/C (LMNA)                               | 2.29 | 3  | Cytoskelton                |
| BP108502  | EST                                                         | 2.30 | 9  |                            |
| AW427905  | EST                                                         | 2.30 | 7  |                            |
| BP110322  | EST                                                         | 2.30 | 5  |                            |
| U39357    | Ovis aries beta actin                                       | 2.31 | 6  | Cytoskelton                |
| AF016090  | Bos taurus mitochondrial D-loop DNA                         | 2.31 | 10 | Mitochondrial              |
| BP110722  | EST                                                         | 2.31 | 8  |                            |
| AW336828  | EST                                                         | 2.31 | 9  |                            |
| AW463047  | EST                                                         | 2.31 | 10 |                            |
| AI936589  | EST                                                         | 2.32 | 7  |                            |
| AC002550  | Homo sapiens BAC clone CIT987SK-A-101F10                    | 2.32 | 9  |                            |
| AW463191  | EST                                                         | 2.32 | 10 |                            |
| L22095    | Bos taurus uterine milk protein                             | 2.33 | 7  |                            |
| X63436    | Bos taurus poly(A) polymerase                               | 2.33 | 9  | Enzyme                     |
| NM_003713 | Homo sapiens phosphatidic acid phosphatase type 2B          | 2.33 | 4  | Enzyme                     |
| NM_001021 | Homo sapiens ribosomal protein S17 (RPS17)                  | 2.34 | 8  | Ribosomal                  |
| AF017178  | Homo sapiens pro alpha 1(I) collagen (COL1A1)               | 2.34 | 3  | ECM & related              |
| NM_002901 | Homo sapiens reticulocalbin 1                               | 2.34 | 9  |                            |
| AF086136  | Homo sapiens clone ZA89C06                                  | 2.35 | 7  |                            |
| NM_002291 | Homo sapiens laminin beta 1 (LAMB1)                         | 2.35 | 10 | ECM & related              |
| NM_000995 | Homo sapiens ribosomal protein L34 (RPL34)                  | 2.35 | 4  | Ribosomal                  |
| BP111119  | EST                                                         | 2.36 | 7  |                            |
| AW425720  | EST                                                         | 2.36 | 5  |                            |
| AW487044  | EST                                                         | 2.36 | 9  |                            |
| AB027196  | Homo sapiens RIE2 sid2705                                   | 2.37 | 10 |                            |
| AW425637  | EST                                                         | 2.38 | 10 |                            |
| AW353384  | EST                                                         | 2.38 | 4  |                            |
| NM_002629 | Homo sapiens phosphoglycerate mutase 1 (PGAM1)              | 2.38 | 6  |                            |
| AF033096  | Avena sativa nonphototropic hypocotyl 1 (NPH1-1)            | 2.39 | 12 |                            |
| BP110221  | EST                                                         | 2.39 | 8  |                            |
| AA945062  | EST                                                         | 2.39 | 7  |                            |
| NM_003130 | Homo sapiens sorcin (SRI)                                   | 2.39 | 3  | ECM & related              |
| AJ132583  | Homo sapiens puromycin sensitive aminopeptidase             | 2.40 | 4  | Enzyme                     |
| AW172770  | EST                                                         | 2.40 | 9  |                            |
| AW437818  | EST                                                         | 2.40 | 10 |                            |
| AF043937  | Homo sapiens DHAPAT                                         | 2.40 | 9  | Enzyme                     |
| AW357664  | EST                                                         | 2.41 | 7  |                            |
| NM_008090 | Mus musculus GATA binding protein 2 (Gata2)                 | 2.41 | 5  | Transcriptional regulator  |
| AW417998  | EST                                                         | 2.42 | 9  |                            |
| BP106875  | EST                                                         | 2.42 | 6  |                            |
| M24103    | Bos taurus ADP/ATP translocase T2                           | 2.42 | 6  | Enzyme                     |
| BP111412  | EST                                                         | 2.42 | 7  |                            |
| BP110097  | EST                                                         | 2.42 | 8  |                            |
| BP110223  | EST                                                         | 2.42 | 8  |                            |
| AW357142  | EST                                                         | 2.42 | 5  |                            |
| NM_001028 | Homo sapiens ribosomal protein S25 (RPS25)                  | 2.42 | 4  | Ribosomal                  |
| AB018262  | Homo sapiens KIAA0719 protein                               | 2.43 | 4  |                            |
| AW465812  | EST                                                         | 2.43 | 7  |                            |
| AW486093  | EST                                                         | 2.44 | 7  |                            |
| BP111373  | EST                                                         | 2.44 | 10 |                            |
| AF161496  | Homo sapiens HSPC147                                        | 2.44 | 9  |                            |
| AW428010  | EST                                                         | 2.45 | 10 |                            |
| AW464572  | EST                                                         | 2.46 | 4  |                            |
| AC006115  | Homo sapiens BAC CIT-B-470f8 (BC330812)                     | 2.46 | 9  |                            |
| U37459    | Mus musculus glia-derived neurotrophic growth factor (GDNF) | 2.47 | 9  | Cytokine family            |
| AW462503  | EST                                                         | 2.48 | 7  |                            |
| AW477939  | EST                                                         | 2.48 | 4  |                            |
| BP108543  | EST                                                         | 2.49 | 10 |                            |
| NM_004530 | Homo sapiens MMP-2                                          | 2.49 | 7  | ECM & related              |
| L41543    | Bos taurus epithelial mucin (MUC1)                          | 2.50 | 11 | Cell adhesion              |
| AF281160  | Bos taurus heparanase                                       | 2.51 | 1  | Cytokine family            |
| AF020512  | Bos taurus PAG-10                                           | 2.51 | 5  | Cytokine family            |
| M26198    | Bos taurus ASS                                              | 2.51 | 9  | Enzyme                     |
| AW314057  | EST                                                         | 2.51 | 5  |                            |
| AI075188  | EST                                                         | 2.51 | 9  |                            |
| AL109939  | Homo sapiens clone RP3-351K20                               | 2.52 | 10 |                            |
| D86562    | Sus scrofa DAD1                                             | 2.52 | 6  | Apoptosis & Cell cycle     |
| AW464053  | EST                                                         | 2.53 | 5  |                            |
| AI854588  | EST                                                         | 2.53 | 1  |                            |
| AW479142  | EST                                                         | 2.53 | 6  |                            |
| BP107816  | EST                                                         | 2.53 | 10 |                            |
| NM_005563 | Homo sapiens stathmin 1/oncoprotein 18 (STMN1)              | 2.54 | 4  | Oncogene & Tumor inhibitor |
| AW464042  | EST                                                         | 2.54 | 4  |                            |
| AW462171  | EST                                                         | 2.55 | 9  |                            |
| NM_001025 | Homo sapiens ribosomal protein S23 (RPS23)                  | 2.55 | 8  | Ribosomal                  |
| AF132048  | Homo sapiens foccen-s                                       | 2.55 | 6  |                            |
| AW316163  | EST                                                         | 2.56 | 8  |                            |
| BP111462  | EST                                                         | 2.57 | 4  |                            |
| BP110551  | EST                                                         | 2.58 | 5  |                            |

|           |                                                                  |      |    |                            |
|-----------|------------------------------------------------------------------|------|----|----------------------------|
| M18344    | Bos taurus vitamin D-dependent calcium binding protein           | 2.60 | 11 |                            |
| AF080067  | Oryctolagus cuniculus SMVT                                       | 2.60 | 6  |                            |
| NM_001615 | Homo sapiens actin gamma 2 (ACTG2)                               | 2.60 | 7  | Cytoskelton                |
| U31307    | EST                                                              | 2.60 | 6  |                            |
| BP110176  | EST                                                              | 2.61 | 4  |                            |
| BP110206  | EST                                                              | 2.61 | 9  |                            |
| AW316336  | EST                                                              | 2.61 | 4  |                            |
| D17554    | Homo sapiens DNA-binding protein, TAXREB107                      | 2.61 | 5  | DNA binding protein        |
| BP111429  | EST                                                              | 2.61 | 5  |                            |
| M19962    | Bos taurus cytochrome c oxidase subunit Vb (coxVb)               | 2.62 | 9  | Enzyme                     |
| AW465855  | EST                                                              | 2.62 | 10 |                            |
| AW447226  | EST                                                              | 2.62 | 9  |                            |
| AW465818  | EST                                                              | 2.62 | 8  |                            |
| AF161415  | Homo sapiens HSPC297                                             | 2.62 | 4  |                            |
| BP107704  | EST                                                              | 2.63 | 4  |                            |
| BP106856  | EST                                                              | 2.63 | 8  |                            |
| BP112312  | EST                                                              | 2.64 | 9  |                            |
| BP111094  | EST                                                              | 2.65 | 9  |                            |
| X17614    | Bos taurus 3 beta hydroxy-5-ene steroid dehydrogenase/delta 5-   | 2.65 | 5  |                            |
| AW464645  | EST                                                              | 2.65 | 3  |                            |
| X03444    | Homo sapiens nuclear envelope protein lamin A precursor          | 2.67 | 6  | Cytoskelton                |
| AF053368  | Mus musculus lysyl oxidase-related protein 2 (Lor2)              | 2.67 | 7  |                            |
| AW463677  | EST                                                              | 2.68 | 6  |                            |
| Z71840    | EST                                                              | 2.69 | 7  |                            |
| AW345047  | EST                                                              | 2.69 | 9  |                            |
| BP111379  | EST                                                              | 2.69 | 7  |                            |
| NM_000210 | Homo sapiens integrin alpha 6 (ITGA6)                            | 2.70 | 3  | Cell adhesion              |
| NM_005766 | Homo sapiens FERM, RhoGEF (ARHGEF)                               | 2.71 | 10 | Cell adhesion              |
| AL117429  | Homo sapiens clone DKFZp434D146                                  | 2.72 | 5  |                            |
| AW429371  | EST                                                              | 2.74 | 7  |                            |
| AF192977  | Ovis aries breast basic conserved protein 1                      | 2.74 | 9  |                            |
| NM_005722 | Homo sapiens ARP2 actin-related protein 2 (ACTR2)                | 2.74 | 8  | Cytoskelton                |
| BP112497  | EST                                                              | 2.74 | 5  |                            |
| AW462223  | EST                                                              | 2.74 | 3  |                            |
| AW409892  | EST                                                              | 2.74 | 6  |                            |
| AW462829  | EST                                                              | 2.75 | 9  |                            |
| AW347614  | EST                                                              | 2.76 | 3  |                            |
| M14630    | Homo sapiens prothymosin alpha                                   | 2.76 | 9  | Oncogene & Tumor inhibitor |
| M11120    | Rat 28S rRNA                                                     | 2.77 | 2  |                            |
| NM_000820 | Homo sapiens growth arrest-specific 6 (GAS6)                     | 2.78 | 7  |                            |
| NM_002130 | Homo sapiens 3-hydroxy-3-methylglutaryl-Coenzyme A synthase      | 2.79 | 6  | Enzyme                     |
| C94642    | EST                                                              | 2.80 | 7  |                            |
| AW479743  | EST                                                              | 2.80 | 9  |                            |
| U22229    | Felis domesticus ribosomal protein L41                           | 2.80 | 8  | Ribosomal                  |
| AW170467  | EST                                                              | 2.80 | 9  |                            |
| U46064    | Sus scrofa aldehyde reductase (ALR1)                             | 2.80 | 3  | Enzyme                     |
| AW207190  | EST                                                              | 2.80 | 9  |                            |
| NM_006471 | Homo sapiens MLCB                                                | 2.81 | 8  | Cytoskelton                |
| AF086462  | Homo sapiens clone ZD85G07                                       | 2.83 | 3  |                            |
| L27152    | Canis familiaris tight junction protein (ZO-2)                   | 2.83 | 5  | Cell adhesion              |
| AF083243  | Homo sapiens HSPC025                                             | 2.84 | 4  |                            |
| AF177394  | Homo sapiens dickkopf-1 (DKK-1)                                  | 2.84 | 5  |                            |
| AI500332  | EST                                                              | 2.84 | 10 |                            |
| BP106894  | EST                                                              | 2.85 | 8  |                            |
| AW463166  | EST                                                              | 2.86 | 4  |                            |
| NM_007278 | Homo sapiens GABA(A) receptor-associated protein                 | 2.87 | 9  |                            |
| NM_003155 | Homo sapiens stanniocalcin (STC1)                                | 2.87 | 5  |                            |
| AW001992  | EST                                                              | 2.87 | 9  |                            |
| AW445987  | EST                                                              | 2.87 | 4  |                            |
| U43701    | Homo sapiens ribosomal protein L23a                              | 2.88 | 6  | Ribosomal                  |
| BP110513  | EST                                                              | 2.88 | 9  |                            |
| M98392    | Canis familiaris oligosaccharyltransferase 48 kDa subunit        | 2.89 | 6  | Enzyme                     |
| X66091    | Mus musculus ASF                                                 | 2.89 | 4  | RNA binding protein        |
| AF124728  | Homo sapiens acinusS'                                            | 2.89 | 4  | Apoptosis & Cell cycle     |
| AL133034  | Homo sapiens clone DKFZp727K171                                  | 2.91 | 11 |                            |
| AF020513  | Bos taurus PAG-11                                                | 2.91 | 12 | Cytokine family            |
| BP110095  | EST                                                              | 2.93 | 8  |                            |
| NM_006835 | Homo sapiens cyclin I (CCNI)                                     | 2.93 | 4  | Apoptosis & Cell cycle     |
| NM_006429 | Homo sapiens CCT7                                                | 2.93 | 11 |                            |
| NM_003144 | Homo sapiens signal sequence receptor alpha (SSR1)               | 2.94 | 6  |                            |
| AW463113  | EST                                                              | 2.94 | 4  |                            |
| NM_004447 | Homo sapiens EPS8                                                | 2.94 | 5  | Cytokine family            |
| AF169035  | Homo sapiens protein kinase SGK3                                 | 2.94 | 7  | Oncogene & Tumor inhibitor |
| M18767    | Homo sapiens complement subcomponent C1s                         | 2.95 | 7  |                            |
| AW464852  | EST                                                              | 2.96 | 9  |                            |
| AB032826  | Bos taurus selp mRNA for selenoprotein P                         | 2.96 | 4  |                            |
| U68187    | Homo sapiens extracellular matrix protein 1 alternative splice v | 2.97 | 5  | ECM & related              |
| BP108483  | EST                                                              | 2.97 | 6  |                            |
| AF106681  | Homo sapiens ras-related GTP-binding protein                     | 2.97 | 11 |                            |
| AW480830  | EST                                                              | 2.97 | 5  |                            |
| D16235    | Bos taurus mRNA for phospholipase C-alpha (PLC alpha)            | 2.97 | 3  | Oncogene & Tumor inhibitor |
| L16953    | Mus musculus tumor cell dnaJ-like protein 1                      | 2.98 | 8  | Oncogene & Tumor inhibitor |
| X91755    | Bos taurus cathepsin L                                           | 2.98 | 8  | Oncogene & Tumor inhibitor |
| M77234    | Homo sapiens ribosomal protein S3a                               | 2.98 | 6  | Ribosomal                  |
| AW315050  | EST                                                              | 2.99 | 5  |                            |
| AF144103  | Homo sapiens NJAC protein                                        | 2.99 | 5  |                            |
| AW447662  | EST                                                              | 2.99 | 4  |                            |
| BP107806  | EST                                                              | 2.99 | 7  |                            |
| L39214    | Ovis aries glucose transporter type 3 (GLUT-3)                   | 3.01 | 8  |                            |
| M17733    | Homo sapiens thymosin beta-4                                     | 3.01 | 6  | Cytoskelton                |
| NM_006831 | Homo sapiens ATP/GTP-binding protein (HEAB)                      | 3.02 | 6  |                            |
| D29643    | Homo sapiens KIAA0115                                            | 3.03 | 6  |                            |
| BP111810  | EST                                                              | 3.03 | 9  |                            |
| J05593    | Homo sapiens TIMP-2                                              | 3.03 | 5  | ECM & related              |
| AF192338  | Bos taurus PAG-21                                                | 3.05 | 7  | Cytokine family            |
| X54978    | Bos taurus 17,000 dalton myosin light chain                      | 3.06 | 4  | Cytoskelton                |
| D30750    | Bos taurus Msx-1                                                 | 3.06 | 10 | Transcriptional regulator  |
| AF210381  | Bos taurus DDVt1                                                 | 3.06 | 4  | ECM & related              |
| AF123303  | Homo sapiens calcium-binding transporter                         | 3.08 | 4  |                            |
| D23660    | Homo sapiens ribosomal protein                                   | 3.09 | 6  | Ribosomal                  |

|           |                                                               |      |    |                            |
|-----------|---------------------------------------------------------------|------|----|----------------------------|
| AF092535  | Homo sapiens mitogen-activated protein kinase p38delta        | 3.09 | 7  | Cytokine family            |
| L10240    | Homo sapiens EMMPRIN                                          | 3.10 | 7  | ECM & related              |
| BP108456  | EST                                                           | 3.11 | 5  |                            |
| M98498    | Bos taurus ezrin                                              | 3.11 | 6  | Cell adhesion              |
| AW482909  | EST                                                           | 3.11 | 4  |                            |
| X12796    | Bos taurus high mobility group 1 (HMG1) protein               | 3.13 | 7  | Transcriptional regulator  |
| BP113042  | EST                                                           | 3.13 | 5  |                            |
| AW464023  | EST                                                           | 3.14 | 5  |                            |
| AW402107  | EST                                                           | 3.14 | 3  |                            |
| AL137647  | Homo sapiens clone DKFZp586M2424                              | 3.14 | 10 |                            |
| BP107808  | EST                                                           | 3.15 | 9  |                            |
| AI985504  | EST                                                           | 3.17 | 10 |                            |
| AB043994  | Bos taurus MMP-2                                              | 3.19 | 7  | ECM & related              |
| AF096304  | Homo sapiens putative sterol reductase SR-1 (TM7SF2)          | 3.22 | 10 | Oncogene & Tumor inhibitor |
| AB028449  | Homo sapiens helicase-MOI                                     | 3.24 | 9  | DNA binding protein        |
| AF192334  | Bos taurus PAG-17                                             | 3.26 | 11 | Cytokine family            |
| AW173315  | EST                                                           | 3.30 | 10 |                            |
| NM_005556 | Homo sapiens keratin 7 (KRT7)                                 | 3.31 | 2  | Cytoskelton                |
| AF020511  | Bos taurus PAG-9                                              | 3.31 | 5  | Cytokine family            |
| AW485227  | EST                                                           | 3.33 | 10 |                            |
| AF133425  | Homo sapiens tetraspanin TM4-C                                | 3.34 | 9  |                            |
| BP107921  | EST                                                           | 3.34 | 11 |                            |
| AW446540  | EST                                                           | 3.35 | 9  |                            |
| BP107862  | EST                                                           | 3.36 | 4  |                            |
| BP110726  | EST                                                           | 3.37 | 9  |                            |
| AW462037  | EST                                                           | 3.38 | 5  |                            |
| NM_000178 | Homo sapiens glutathione synthetase (GSS)                     | 3.39 | 10 | Enzyme                     |
| NM_005731 | Homo sapiens actin related protein 2/3 complex, subunit 2     | 3.42 | 6  | Cytoskelton                |
| BP108275  | EST                                                           | 3.42 | 5  |                            |
| NM_001425 | Homo sapiens epithelial membrane protein 3 (EMP3)             | 3.43 | 10 | Membrane protein           |
| Y16698    | Homo sapiens HIV associated non-Hodgkin's lymphoma            | 3.44 | 5  | Oncogene & Tumor inhibitor |
| AW485575  | EST                                                           | 3.44 | 11 |                            |
| AW462849  | EST                                                           | 3.45 | 11 |                            |
| U89321    | Homo sapiens nucleophosmin phosphoprotein (NPM)               | 3.45 | 5  |                            |
| BP107341  | EST                                                           | 3.48 | 9  |                            |
| X59617    | Homo sapiens large subunit ribonucleotide reductase (RR1)     | 3.53 | 4  | Enzyme                     |
| AW425334  | EST                                                           | 3.55 | 4  |                            |
| NM_006838 | Homo sapiens methionine methionyl aminopeptidase 2            | 3.56 | 4  | Enzyme                     |
| AF192332  | Bos taurus PAG-15                                             | 3.59 | 11 | Cytokine family            |
| M26576    | Homo sapiens alpha-1 collagen type IV                         | 3.59 | 6  | ECM & related              |
| AW358439  | EST                                                           | 3.60 | 9  |                            |
| BP106942  | EST                                                           | 3.60 | 6  |                            |
| BP110199  | EST                                                           | 3.61 | 4  |                            |
| D50047    | Bos taurus KQ217 MHC class II DQA2                            | 3.62 | 5  | Cytokine family            |
| NM_003922 | Homo sapiens hect domain and RCC1-like domain 1               | 3.62 | 10 |                            |
| BP112988  | EST                                                           | 3.62 | 9  |                            |
| BP107252  | EST                                                           | 3.66 | 4  |                            |
| AW417930  | EST                                                           | 3.66 | 9  |                            |
| AF210379  | Bos taurus matrix Gla protein                                 | 3.68 | 5  | ECM & related              |
| AW356791  | EST                                                           | 3.68 | 5  |                            |
| AW418429  | EST                                                           | 3.68 | 9  |                            |
| AA157933  | EST                                                           | 3.69 | 9  |                            |
| BP110145  | EST                                                           | 3.74 | 8  |                            |
| BP112105  | EST                                                           | 3.74 | 9  |                            |
| AW337037  | EST                                                           | 3.75 | 10 |                            |
| L07872    | Homo sapiens Jk-recombination signal binding protein          | 3.75 | 8  | Apoptosis & Cell cycle     |
| M73962    | Bos taurus PAG-1                                              | 3.79 | 5  | Cytokine family            |
| BP111196  | EST                                                           | 3.80 | 9  |                            |
| BP107825  | EST                                                           | 3.82 | 4  |                            |
| L34261    | Bos taurus palmitoyl-protein thioesterase                     | 3.85 | 6  | Enzyme                     |
| AW326216  | EST                                                           | 3.87 | 6  |                            |
| AF192333  | Bos taurus PAG-16                                             | 3.89 | 11 | Cytokine family            |
| K02130    | Bos taurus cytochrome P-450 (SCC)                             | 3.90 | 5  |                            |
| AB004272  | Bos taurus Placenta Growth Factor (PLGF)                      | 3.91 | 5  | Cytokine family            |
| AL080102  | Homo sapiens clone DKFZp564N1916                              | 3.92 | 9  |                            |
| AI887421  | EST                                                           | 3.94 | 4  |                            |
| AW311764  | EST                                                           | 4.00 | 6  |                            |
| AW465464  | EST                                                           | 4.01 | 5  |                            |
| AW344418  | EST                                                           | 4.02 | 9  |                            |
| AW430319  | EST                                                           | 4.03 | 6  |                            |
| U49973    | Homo sapiens Tigger1 transposable element                     | 4.05 | 9  |                            |
| AV404300  | EST                                                           | 4.08 | 7  |                            |
| NM_001294 | Homo sapiens CLPTM1                                           | 4.11 | 4  | Cytokine family            |
| AF020507  | Bos taurus PAG-5                                              | 4.11 | 11 | Cytokine family            |
| J02840    | Bos taurus placental lactogen (bPL-Ala)                       | 4.14 | 5  | Cytokine family            |
| AW356197  | EST                                                           | 4.16 | 11 |                            |
| Y00712    | Bos taurus proteoglycan II                                    | 4.20 | 9  | ECM & related              |
| BP106981  | EST                                                           | 4.20 | 6  |                            |
| NM_001006 | Homo sapiens ribosomal protein S3A (RPS3A)                    | 4.24 | 6  | Ribosomal                  |
| AW482131  | EST                                                           | 4.25 | 4  |                            |
| V00493    | Homo sapiens alpha globin                                     | 4.26 | 9  |                            |
| AI052255  | EST                                                           | 4.26 | 9  |                            |
| U02892    | Bos taurus Angus 70 kda heat shock protein-2 (HSP70-2)        | 4.28 | 6  | Heat shock protein         |
| D90069    | Bos taurus adenylate kinase isozyme 2                         | 4.29 | 9  | Oncogene & Tumor inhibitor |
| BP112100  | EST                                                           | 4.30 | 5  |                            |
| M80328    | Bos taurus PL-Val                                             | 4.32 | 5  | Cytokine family            |
| J03604    | Bos taurus glutamine synthetase                               | 4.38 | 9  | Enzyme                     |
| L47641    | Bos taurus type III pro-collagen                              | 4.39 | 4  | ECM & related              |
| D88033    | Bos taurus elenoprotein P-like protein                        | 4.43 | 9  |                            |
| AF144628  | Mus musculus SLIT2                                            | 4.47 | 9  |                            |
| NM_003289 | Homo sapiens tropomyosin 2 (beta) (TPM2)                      | 4.47 | 11 | Cytoskelton                |
| M73961    | Ovis aries PAG-1                                              | 4.52 | 6  | Cytokine family            |
| BP106989  | EST                                                           | 4.52 | 8  |                            |
| BP106952  | EST                                                           | 4.53 | 6  |                            |
| AI081391  | EST                                                           | 4.66 | 10 |                            |
| BP106971  | EST                                                           | 4.67 | 8  |                            |
| AW464827  | EST                                                           | 4.75 | 4  |                            |
| AF153062  | Canis familiaris type I collagen pro-alpha1(I) chain (COL1A1) | 4.76 | 4  | ECM & related              |
| M65219    | Bos taurus placental lactogen (PL-Ala)                        | 4.76 | 5  | Cytokine family            |
| AF059507  | Bos taurus epidermal fatty acid-binding protein (E-FABP)      | 4.80 | 9  |                            |

|           |                                                   |       |    |                     |
|-----------|---------------------------------------------------|-------|----|---------------------|
| J05391    | Bos taurus glycoprotein III (GpIII)               | 4.82  | 5  | ECM & related       |
| AF192330  | Bos taurus PAG-13                                 | 4.84  | 5  | Cytokine family     |
| U09861    | Bos taurus 70 kDA heat-shock protein (hsp70)      | 4.86  | 4  | Heat shock protein  |
| AF079545  | Ovis aries placental lactogen precursor (PL)      | 4.90  | 8  | Cytokine family     |
| AC005041  | Homo sapiens BAC clone RP11-523H20                | 4.95  | 10 |                     |
| AW417073  | EST                                               | 4.95  | 9  |                     |
| L02897    | Dog nonerythroid beta-spectrin                    | 5.01  | 9  |                     |
| AW481108  | EST                                               | 5.05  | 4  |                     |
| AF020514  | Bos taurus PAG-12                                 | 5.06  | 11 | Cytokine family     |
| AW347854  | EST                                               | 5.08  | 6  |                     |
| AF020509  | Bos taurus PAG-7                                  | 5.14  | 11 | Cytokine family     |
| AW465912  | EST                                               | 5.20  | 11 |                     |
| M25493    | Bos taurus PRP-I                                  | 5.22  | 11 | Cytokine family     |
| AW464661  | EST                                               | 5.29  | 11 |                     |
| AF192336  | Bos taurus PAG-19                                 | 5.47  | 11 | Cytokine family     |
| AW260930  | EST                                               | 5.60  | 4  |                     |
| AI299947  | EST                                               | 5.67  | 6  |                     |
| AB004800  | Sus scrofa S100C protein                          | 5.68  | 9  | Cytokine family     |
| AW464536  | EST                                               | 5.78  | 5  |                     |
| BP111926  | EST                                               | 5.83  | 11 |                     |
| AW465434  | EST                                               | 5.86  | 11 |                     |
| AW465275  | EST                                               | 6.23  | 6  |                     |
| AA837482  | EST                                               | 6.27  | 5  |                     |
| J02944    | Bos taurus PRP-1                                  | 6.40  | 11 | Cytokine family     |
| AF125041  | Ovis aries decorin                                | 6.42  | 4  |                     |
| AF020508  | Bos taurus PAG-6                                  | 6.54  | 11 | Cytokine family     |
| M21683    | Sus scrofa nonhistone protein HMG1                | 6.58  | 8  | DNA binding protein |
| NM_001553 | Homo sapiens IGFBP7                               | 6.62  | 9  | Cytokine family     |
| BP110986  | EST                                               | 6.62  | 4  |                     |
| M32303    | Bos taurus metalloproteinase inhibitor            | 6.82  | 11 | ECM & related       |
| L06151    | Bos taurus PAG-2                                  | 6.86  | 11 | Cytokine family     |
| NM_001613 | Homo sapiens actin, alpha 2 (ACTA2)               | 6.98  | 4  | Cytoskelton         |
| AW411362  | EST                                               | 7.24  | 9  |                     |
| AF196320  | Bos taurus Interferon-tau1C                       | 7.39  | 2  | Cytokine family     |
| S74761    | Bos taurus water channel protein CHIP29           | 7.44  | 9  | Membrane protein    |
| X15975    | Bos taurus PRP-V                                  | 7.59  | 11 | Cytokine family     |
| X65210    | Bos taurus microsatellite DNA                     | 7.62  | 11 |                     |
| AF105429  | Ovis aries H19                                    | 7.81  | 4  |                     |
| AA459491  | EST                                               | 8.03  | 11 |                     |
| BP111741  | EST                                               | 8.28  | 11 |                     |
| BP107836  | EST                                               | 8.34  | 11 |                     |
| AW461617  | EST                                               | 8.75  | 10 |                     |
| AW464858  | EST                                               | 8.86  | 11 |                     |
| AB008683  | Bos taurus alpha2(I) collagen (COL1A2)            | 9.27  | 4  | ECM & related       |
| AW463668  | EST                                               | 9.53  | 5  |                     |
| X59504    | Bos taurus prolactin-like protein (PRP-VI)        | 9.62  | 11 | Cytokine family     |
| X15112    | Bos taurus cytochrome c oxidase subunit VIb (AED) | 10.01 | 4  |                     |
| AW447630  | EST                                               | 10.10 | 4  |                     |
| U21660    | Bos taurus phosphatidylcholine transfer protein   | 10.13 | 4  |                     |
| AW484058  | EST                                               | 10.27 | 9  |                     |
| BP112727  | EST                                               | 10.74 | 11 |                     |
| BP107329  | EST                                               | 11.33 | 4  |                     |
| BP111398  | EST                                               | 12.04 | 11 |                     |
| AW463993  | EST                                               | 12.50 | 11 |                     |
| AW486937  | EST                                               | 14.86 | 4  |                     |
| AF004877  | Homo sapiens pro-alpha 2(I) collagen (COL1A2)     | 16.08 | 4  | ECM & related       |
| AW462349  | EST                                               | 19.49 | 11 |                     |
| AW484050  | EST                                               | 20.80 | 11 |                     |
| BP108333  | EST                                               | 22.13 | 11 |                     |

Supplement Table 3

Two-fold differentially expressed genes between Day 21E vs Day 28EEM.

| Accession# | Gene name                                                   | D28M/D21E | k-means | classification             |
|------------|-------------------------------------------------------------|-----------|---------|----------------------------|
|            | Day 28EEM/Day 21E down-regulated genes (< 0.5)              |           |         |                            |
| BP108333   | EST                                                         | 0.05      | 11      |                            |
| AF196320   | Bos taurus Interferon-tau1C                                 | 0.07      | 2       | Cytokine family            |
| AI299947   | EST                                                         | 0.12      | 6       |                            |
| BP107329   | EST                                                         | 0.15      | 4       |                            |
| AW486937   | EST                                                         | 0.15      | 4       |                            |
| BP111398   | EST                                                         | 0.20      | 11      |                            |
| AF033096   | Avena sativa nonphototropic hypocotyl 1 (NPH1-1)            | 0.22      | 12      |                            |
| AW461617   | EST                                                         | 0.23      | 10      |                            |
| L10240     | Homo sapiens EMMPRIN                                        | 0.24      | 7       | ECM & related              |
| U21660     | Bos taurus phosphatidylcholine transfer protein             | 0.27      | 4       |                            |
| AW347854   | EST                                                         | 0.27      | 6       |                            |
| X15112     | Bos taurus cytochrome c oxidase subunit VIb (AED)           | 0.28      | 4       |                            |
| L34261     | Bos taurus palmitoyl-protein thioesterase                   | 0.29      | 6       | Enzyme                     |
| M26576     | Homo sapiens alpha-1 collagen type IV                       | 0.29      | 6       | ECM & related              |
| NM_001747  | Homo sapiens capping protein, gelsolin-like (CAPG)          | 0.32      | 2       | Cytoskelton                |
| BP109933   | EST                                                         | 0.33      | 12      |                            |
| U46064     | Sus scrofa aldehyde reductase (ALR1)                        | 0.33      | 3       | Enzyme                     |
| AF020513   | Bos taurus PAG-11                                           | 0.33      | 12      | Cytokine family            |
| M11120     | Rat 28S rRNA                                                | 0.33      | 2       |                            |
| AW479517   | EST                                                         | 0.34      | 8       |                            |
| NM_004718  | Homo sapiens COX7A2L                                        | 0.34      | 8       | Enzyme                     |
| BP112770   | EST                                                         | 0.35      | 3       |                            |
| AI985504   | EST                                                         | 0.35      | 10      |                            |
| AF144763   | Bos taurus TIMP-1                                           | 0.35      | 3       | ECM & related              |
| AF034607   | Homo sapiens chloride channel ABP                           | 0.36      | 8       | Membrane protein           |
| NM_005556  | Homo sapiens keratin 7 (KRT7)                               | 0.36      | 2       | Cytoskelton                |
| AJ243656   | Methanobacterium thermoautotrophicum ehbA-Q                 | 0.37      | 2       |                            |
| M83104     | Bos taurus cytochrome b5 reductase                          | 0.37      | 2       | Enzyme                     |
| BP107836   | EST                                                         | 0.38      | 11      |                            |
| AW427611   | EST                                                         | 0.38      | 12      |                            |
| X59693     | Bos taurus ubiquinol-cytochrome-c reductase (subunit II)    | 0.38      | 6       | Enzyme                     |
| D84557     | Homo sapiens HsMcm6                                         | 0.38      | 12      |                            |
| M77234     | Homo sapiens ribosomal protein S3a                          | 0.38      | 6       | Ribosomal                  |
| AF033095   | Homo sapiens testis enhanced gene transcript protein        | 0.38      | 12      | Transcriptional regulator  |
| AW482335   | EST                                                         | 0.38      | 12      |                            |
| AI500332   | EST                                                         | 0.38      | 10      |                            |
| AB043994   | Bos taurus MMP-2                                            | 0.39      | 7       | ECM & related              |
| NM_003720  | Homo sapiens down syndrome critical region 2 (DSCR2)        | 0.39      | 3       | DNA binding protein        |
| AV404300   | EST                                                         | 0.39      | 7       |                            |
| AI827165   | EST                                                         | 0.39      | 8       |                            |
| AB009282   | Homo sapiens mRNA for cytochrome b5                         | 0.39      | 12      |                            |
| NM_002949  | Homo sapiens ribosomal protein L12 (MRPL12)                 | 0.39      | 2       | Ribosomal                  |
| D86562     | Sus scrofa DAD1                                             | 0.39      | 6       | Apoptosis & Cell cycle     |
| U49973     | Homo sapiens Tigger1 transposable element                   | 0.39      | 9       |                            |
| AF086462   | Homo sapiens clone ZD85G07                                  | 0.39      | 3       |                            |
| BP111625   | EST                                                         | 0.40      | 12      |                            |
| AJ000039   | Bos taurus glyceraldehyde 3-phosphate dehydrogenase         | 0.40      | 12      | Enzyme                     |
| AF197060   | Homo sapiens src homology 3 domain-containing protein HIP-4 | 0.40      | 12      |                            |
| AW463657   | EST                                                         | 0.40      | 12      |                            |
| AW484367   | EST                                                         | 0.40      | 8       |                            |
| AF083246   | Homo sapiens HSPC028                                        | 0.40      | 12      |                            |
| AF160639   | EST                                                         | 0.40      | 10      |                            |
| J03604     | Bos taurus glutamine synthetase                             | 0.40      | 9       | Enzyme                     |
| AW464827   | EST                                                         | 0.40      | 4       |                            |
| NM_002574  | Homo sapiens proliferation-associated gene A                | 0.40      | 6       | Oncogene & Tumor inhibitor |
| AJ249625   | Paracentrotus lividus Chaperonin (hsp60)                    | 0.41      | 3       | Heat shock protein         |
| Z25531     | Bos taurus repeat region DNA                                | 0.41      | 3       |                            |
| NM_000365  | Homo sapiens triosephosphate isomerase 1 (TPI1)             | 0.41      | 12      |                            |
| AW416500   | EST                                                         | 0.41      | 2       |                            |
| NM_002130  | Homo sapiens HMGCS1                                         | 0.41      | 6       | Enzyme                     |
| AC002550   | Homo sapiens Chromosome 16 BAC clone CIT987SK-A-101F        | 0.41      | 9       |                            |
| AI326172   | EST                                                         | 0.41      | 12      |                            |
| NM_002107  | Homo sapiens H3 histone, family 3A (H3F3A)                  | 0.42      | 12      | Heat shock protein         |
| AW485507   | EST                                                         | 0.42      | 3       |                            |
| NM_001827  | Homo sapiens CDC28 protein kinase 2 (CKS2)                  | 0.42      | 8       | Apoptosis & Cell cycle     |
| NM_004393  | Homo sapiens dystroglycan 1 (DAG1)                          | 0.42      | 12      | Cell adhesion              |
| AF195417   | Homo sapiens DEAD-box protein abstract (ABS)                | 0.42      | 2       |                            |
| AW445987   | EST                                                         | 0.42      | 4       |                            |
| AF083441   | Homo sapiens SUI1 isolog                                    | 0.42      | 12      | Transcriptional regulator  |
| D14074     | Bos taurus cyclophilin                                      | 0.42      | 8       |                            |
| AF002693   | Homo sapiens ATQL1 pseudogene                               | 0.42      | 2       |                            |
| M16464     | Bos taurus calpactin I light chain (p11)                    | 0.42      | 12      | Cytoskelton                |
| X16312     | Homo sapiens phosphatase/casein kinase II beta subunit      | 0.43      | 12      | Enzyme                     |
| AC005041   | Homo sapiens BAC clone RP11-523H20 from Ch2                 | 0.43      | 10      |                            |
| AB003094   | Bos taurus ferritin L subunit                               | 0.43      | 12      |                            |
| NM_005801  | Homo sapiens putative translation initiation factor (SUI1)  | 0.43      | 6       | Transcriptional regulator  |
| NM_004596  | Homo sapiens small nuclear ribonucleoprotein polypeptide A  | 0.43      | 12      | Nuclear protein            |
| M55409     | Homo sapiens pancreatic tumor-related protein               | 0.43      | 6       | Oncogene & Tumor inhibitor |
| AW195100   | EST                                                         | 0.43      | 2       |                            |
| X76980     | Bos taurus epsilon-COP                                      | 0.43      | 8       |                            |
| U31307     | EST                                                         | 0.43      | 6       |                            |
| AW353298   | EST                                                         | 0.43      | 6       |                            |
| AW485951   | EST                                                         | 0.43      | 12      |                            |
| AF131745   | Homo sapiens clone 25110                                    | 0.43      | 12      |                            |
| Y16849     | Thermobacillus xylanilyticus xynA and abfA                  | 0.43      | 2       |                            |
| AW298224   | EST                                                         | 0.44      | 6       |                            |
| NM_006704  | Homo sapiens suppressor of G2 allele of SKP1                | 0.44      | 12      |                            |
| J05201     | Bos taurus liver cytochrome c oxidase subunit CIX (VIII)    | 0.44      | 12      | Enzyme                     |
| AF094481   | Homo sapiens CGGBP                                          | 0.44      | 6       | DNA binding protein        |
| NM_000387  | Homo sapiens solute carrier family 25                       | 0.44      | 2       | Mitochondrial              |
| AW462084   | EST                                                         | 0.44      | 8       |                            |
| AW486434   | EST                                                         | 0.44      | 2       |                            |
| AA933350   | EST                                                         | 0.45      | 2       |                            |
| NM_006496  | Homo sapiens GNAI3                                          | 0.45      | 8       | DNA binding protein        |
| AF078863   | Homo sapiens PTD010                                         | 0.45      | 8       |                            |

|                                            |                                                               |      |    |                            |
|--------------------------------------------|---------------------------------------------------------------|------|----|----------------------------|
| BP109730                                   | EST                                                           | 0.45 | 2  |                            |
| X12877                                     | Bos taurus cytokeratin A (no. 8)                              | 0.45 | 12 | Cytoskelton                |
| AF015767                                   | Homo sapiens brain and reproductive organ-expressed protein   | 0.45 | 3  |                            |
| AW359222                                   | EST                                                           | 0.46 | 1  |                            |
| AW359131                                   | EST                                                           | 0.46 | 3  |                            |
| U09861                                     | Bos taurus 70 kDa heat-shock protein (hsp70)                  | 0.46 | 4  | Heat shock protein         |
| NM_005572                                  | Homo sapiens lamin A/C (LMNA)                                 | 0.46 | 3  | Cytoskelton                |
| AW431917                                   | EST                                                           | 0.46 | 12 |                            |
| M24103                                     | Bos taurus ADP/ATP translocase T2                             | 0.46 | 6  | Enzyme                     |
| AW157835                                   | EST                                                           | 0.46 | 2  |                            |
| Z25466                                     | Bos taurus mitochondrial aspartate aminotransferase           | 0.46 | 10 | Mitochondrial              |
| NM_010064                                  | Mus musculus Dncic2                                           | 0.46 | 3  | Cytoskelton                |
| NM_001416                                  | Homo sapiens EIF4A1                                           | 0.46 | 12 | Transcriptional regulator  |
| BP112666                                   | EST                                                           | 0.46 | 3  |                            |
| V01270                                     | Rattus norvegicus 18S, 5.8S, and 28S ribosomal RNAs           | 0.46 | 3  |                            |
| NM_002300                                  | Homo sapiens lactate dehydrogenase B (LDHB)                   | 0.46 | 6  | Enzyme                     |
| X56503                                     | Sus scrofa casein kinase II beta subunit (CKII beta)          | 0.46 | 12 | Enzyme                     |
| V00654                                     | Bos taurus mitochondrial genome                               | 0.46 | 8  | Mitochondrial              |
| Z11531                                     | Homo sapiens elongation factor-1-gamma                        | 0.46 | 12 | Transcriptional regulator  |
| U01946                                     | Ovis aries secretory protein                                  | 0.46 | 12 |                            |
| M83656                                     | Bos taurus cytoplasmic phosphotyrosyl protein phosphatase     | 0.46 | 9  | Enzyme                     |
| NM_010447                                  | Mus musculus heterogeneous nuclear ribonucleoprotein A1       | 0.46 | 6  | Nuclear protein            |
| AA188595                                   | EST                                                           | 0.46 | 12 |                            |
| Z33879                                     | Sus scrofa G-beta like protein                                | 0.47 | 8  |                            |
| AF044670                                   | Homo sapiens 33 kDa Vamp-associated protein (VAP33)           | 0.47 | 10 | Membrane protein           |
| AF102850                                   | Homo sapiens dolichyl-phosphate beta-glucosyltransferase      | 0.47 | 2  | Enzyme                     |
| X56597                                     | Homo sapiens humFib fibrillarlin                              | 0.47 | 12 |                            |
| X82879                                     | Artificial sequences DNA for ART 2                            | 0.47 | 2  |                            |
| U21661                                     | Rattus norvegicus myotrophin                                  | 0.47 | 2  | Cytokine family            |
| U65789                                     | Bos taurus intercellular adhesion molecule-1 (ICAM-1)         | 0.47 | 8  | Cell adhesion              |
| X65210                                     | Bos taurus microsatellite DNA                                 | 0.47 | 11 |                            |
| AW336383                                   | EST                                                           | 0.47 | 12 |                            |
| X06088                                     | Bos taurus mRNA for mitochondrial ATP synthase b-subunit      | 0.47 | 8  | Mitochondrial              |
| AF161415                                   | Homo sapiens HSPC297                                          | 0.47 | 4  |                            |
| AW427732                                   | EST                                                           | 0.47 | 3  |                            |
| AW464287                                   | EST                                                           | 0.48 | 8  |                            |
| AA933125                                   | EST                                                           | 0.48 | 2  |                            |
| AW466068                                   | EST                                                           | 0.48 | 8  |                            |
| D90069                                     | Bos taurus adenylate kinase isozyme 2                         | 0.48 | 9  | Oncogene & Tumor inhibitor |
| AW327109                                   | EST                                                           | 0.48 | 8  |                            |
| BP112940                                   | EST                                                           | 0.48 | 3  |                            |
| X02493                                     | Homo sapiens interferon-inducible (cDNA 6-26)                 | 0.48 | 6  | Cytokine family            |
| AW465818                                   | EST                                                           | 0.48 | 8  |                            |
| M38520                                     | Bos taurus cytochrome-c oxidase subunit VIa-liver isoform     | 0.48 | 8  | Enzyme                     |
| X69084                                     | Bos taurus beta 2-microglobulin                               | 0.48 | 6  | Cytokine family            |
| AW356038                                   | EST                                                           | 0.48 | 8  |                            |
| NM_001294                                  | Homo sapiens CLPTM1                                           | 0.48 | 4  | Cytokine family            |
| BP106883                                   | EST                                                           | 0.49 | 8  |                            |
| NM_003528                                  | Homo sapiens H2B histone family, member Q (H2BFQ)             | 0.49 | 8  | Heat shock protein         |
| NM_001404                                  | Homo sapiens eukaryotic translation elongation factor 1 gamma | 0.49 | 12 | Transcriptional regulator  |
| AF092565                                   | Homo sapiens splicing factor Prp8                             | 0.49 | 6  | Transcriptional regulator  |
| U84139                                     | Bos taurus structure-specific recognition protein 1 (SSRP1)   | 0.49 | 6  |                            |
| BP111975                                   | EST                                                           | 0.49 | 8  |                            |
| BP112742                                   | EST                                                           | 0.49 | 8  |                            |
| NM_002809                                  | Homo sapiens proteasome 26S subunit, non-ATPase, 3 (PSMD)     | 0.49 | 12 |                            |
| AW432050                                   | EST                                                           | 0.49 | 9  |                            |
| U17836                                     | Bos taurus acidic ribosomal protein P2                        | 0.49 | 2  | Ribosomal                  |
| AW463047                                   | EST                                                           | 0.49 | 10 |                            |
| AF102243                                   | Odocoileus hemionus DeerC106 tetranucleotide microsatellite F | 0.49 | 2  |                            |
| AB006852                                   | Rattus norvegicus phosphoarginine phosphatase                 | 0.49 | 3  | Enzyme                     |
| NM_006838                                  | Homo sapiens methionine methionyl aminopeptidase 2            | 0.49 | 4  | Enzyme                     |
| AW464605                                   | EST                                                           | 0.49 | 12 |                            |
| A1908445                                   | EST                                                           | 0.50 | 3  |                            |
| U76713                                     | Homo sapiens apobec-1 binding protein 1                       | 0.50 | 8  |                            |
| AW461814                                   | EST                                                           | 0.50 | 12 |                            |
| NM_006082                                  | Homo sapiens tubulin, alpha, ubiquitous (K-ALPHA-1)           | 0.50 | 8  | Cytoskelton                |
| AW470246                                   | EST                                                           | 0.50 | 12 |                            |
| M59755                                     | Bos taurus llens aldose reductase pseudogene                  | 0.50 | 6  |                            |
| U71273                                     | Sus scrofa glucosidase II                                     | 0.50 | 6  | Enzyme                     |
| D16235                                     | Bos taurus phospholipase C-alpha (PLC alpha)                  | 0.50 | 3  | Oncogene & Tumor inhibitor |
| AT001971                                   | EST                                                           | 0.50 | 2  |                            |
| A1276594                                   | EST                                                           | 0.50 | 3  |                            |
| NM_003969                                  | Homo sapiens ubiquitin-conjugating enzyme E2M (UBE2M)         | 0.50 | 2  | Heat shock protein         |
| BP107694                                   | EST                                                           | 0.50 | 1  |                            |
| AW307760                                   | EST                                                           | 0.50 | 2  |                            |
| BP111504                                   | EST                                                           | 0.50 | 8  |                            |
| AB000425                                   | Sus scrofa endopeptidase 24.16                                | 0.50 | 8  | Oncogene & Tumor inhibitor |
| Day 28EEM/Day 21E up-regulated genes (2 <) |                                                               |      |    |                            |
| Z11742                                     | Bos taurus annexin XI                                         | 2.00 | 5  | Apoptosis & Cell cycle     |
| M80328                                     | Bos taurus PL-Val                                             | 2.01 | 5  | Cytokine family            |
| X59504                                     | Bos taurus PRP-VI                                             | 2.08 | 11 | Cytokine family            |
| D10989                                     | Bos taurus endothelin ETB receptor                            | 2.12 | 1  |                            |
| AB005148                                   | Bos taurus interleukin 1 (IL-1) receptor antagonist           | 2.13 | 1  | Cytokine family            |
| AF192336                                   | Bos taurus PAG-19                                             | 2.17 | 11 | Cytokine family            |
| BP110455                                   | EST                                                           | 2.18 | 1  |                            |
| J02840                                     | Bos taurus placental lactogen (PL-Ala)                        | 2.21 | 5  | Cytokine family            |
| M73961                                     | Ovis aries PAG-1                                              | 2.35 | 6  | Cytokine family            |
| AF004133                                   | Sus scrofa adipocyte membrane protein                         | 2.66 | 1  | Membrane protein           |
| AW463219                                   | EST                                                           | 2.77 | 5  |                            |
| BP111699                                   | EST                                                           | 2.85 | 5  |                            |
| X01912                                     | Goat epsilon I beta-globin                                    | 3.00 | 9  |                            |
| AF020508                                   | Bos taurus PAG-6                                              | 3.45 | 11 | Cytokine family            |

**Supplement Table 4**

Two-fold differentially expressed genes between Day 28EEM vs Day 28F.

| Accession#                                      | Gene name                                                      | D28F/D28M | k-means | classification            |
|-------------------------------------------------|----------------------------------------------------------------|-----------|---------|---------------------------|
| Day 28F /Day 28EEM down-regulated genes (< 0.5) |                                                                |           |         |                           |
| AW462349                                        | EST                                                            | 0.05      | 11      |                           |
| AW484050                                        | EST                                                            | 0.12      | 11      |                           |
| M73961                                          | Ovis aries PAG-1                                               | 0.14      | 6       | Cytokine family           |
| X89984                                          | Homo sapiens BCL7A protein                                     | 0.14      | 12      | Cytoskelton               |
| AA459491                                        | EST                                                            | 0.14      | 11      |                           |
| X15975                                          | Bos taurus PRP-V                                               | 0.15      | 11      | Cytokine family           |
| AW464858                                        | EST                                                            | 0.15      | 11      |                           |
| BP111741                                        | EST                                                            | 0.15      | 11      |                           |
| AF079545                                        | Ovis aries placental lactogen precursor (PL)                   | 0.16      | 8       | Cytokine family           |
| AF020509                                        | Bos taurus PAG-7                                               | 0.19      | 11      | Cytokine family           |
| J02840                                          | Bos taurus placental lactogen (bPL-Ala)                        | 0.20      | 5       | Cytokine family           |
| X59504                                          | Bos taurus PRP-VI                                              | 0.20      | 11      | Cytokine family           |
| S72871                                          | Homo sapiens GATA-2 transcription factor                       | 0.20      | 8       | Transcriptional regulator |
| AW463993                                        | EST                                                            | 0.20      | 11      |                           |
| M65219                                          | Bos taurus placental lactogen (bPL-Ala)                        | 0.22      | 5       | Cytokine family           |
| AF192336                                        | Bos taurus PAG-19                                              | 0.22      | 11      | Cytokine family           |
| BP112760                                        | EST                                                            | 0.23      | 12      |                           |
| AW464536                                        | EST                                                            | 0.23      | 5       |                           |
| AF020508                                        | Bos taurus PAG-6                                               | 0.23      | 11      | Cytokine family           |
| AA837482                                        | EST                                                            | 0.23      | 5       |                           |
| BP107836                                        | EST                                                            | 0.24      | 11      |                           |
| J02944                                          | Bos taurus PRP-I                                               | 0.24      | 11      | Cytokine family           |
| BP112768                                        | EST                                                            | 0.24      | 12      |                           |
| L06151                                          | Bos taurus PAG-2                                               | 0.25      | 11      | Cytokine family           |
| AF020512                                        | Bos taurus PAG-10                                              | 0.27      | 5       | Cytokine family           |
| AW465434                                        | EST                                                            | 0.27      | 11      |                           |
| AW356791                                        | EST                                                            | 0.28      | 5       |                           |
| AF020514                                        | Bos taurus PAG-12                                              | 0.28      | 11      | Cytokine family           |
| AW464645                                        | EST                                                            | 0.28      | 3       |                           |
| AW463668                                        | EST                                                            | 0.29      | 5       |                           |
| BP112727                                        | EST                                                            | 0.29      | 11      |                           |
| AW485575                                        | EST                                                            | 0.30      | 11      |                           |
| AF192334                                        | Bos taurus PAG-17                                              | 0.30      | 11      | Cytokine family           |
| AL133034                                        | Homo sapiens clone DKFZp727K171                                | 0.31      | 11      |                           |
| Z11742                                          | Bos taurus annexin XI                                          | 0.31      | 5       | Apoptosis & Cell cycle    |
| U89321                                          | Homo sapiens nucleophosmin phosphoprotein (NPM)                | 0.32      | 5       |                           |
| M25493                                          | Bos taurus PRP-I                                               | 0.32      | 11      | Cytokine family           |
| M80328                                          | Bos taurus bPL-Val                                             | 0.32      | 5       | Cytokine family           |
| X17614                                          | Bos taurus 3 beta hydroxy-5-ene steroid dehydrogenase/delta 5- | 0.32      | 5       |                           |
| AF192333                                        | Bos taurus PAG-16                                              | 0.32      | 11      | Cytokine family           |
| AF020507                                        | Bos taurus PAG-5                                               | 0.34      | 11      | Cytokine family           |
| AW464661                                        | EST                                                            | 0.34      | 11      |                           |
| AW465275                                        | EST                                                            | 0.34      | 6       |                           |
| AW465912                                        | EST                                                            | 0.34      | 11      |                           |
| AW462855                                        | EST                                                            | 0.34      | 11      |                           |
| AF020511                                        | Bos taurus PAG-9                                               | 0.35      | 5       | Cytokine family           |
| AF020510                                        | Bos taurus PAG-8                                               | 0.35      | 3       | Cytokine family           |
| BP110551                                        | EST                                                            | 0.35      | 5       |                           |
| AF106681                                        | Homo sapiens ras-related GTP-binding protein                   | 0.36      | 11      |                           |
| BP110145                                        | EST                                                            | 0.37      | 8       |                           |
| M33269                                          | Bos taurus PRP-IV                                              | 0.37      | 3       | Cytokine family           |
| AF192332                                        | Bos taurus PAG-15                                              | 0.37      | 11      | Cytokine family           |
| AW463219                                        | EST                                                            | 0.37      | 5       |                           |
| NM_005720                                       | Homo sapiens actin related protein 2/3 complex, subunit 1B     | 0.38      | 3       | Cytoskelton               |
| AW465464                                        | EST                                                            | 0.38      | 5       |                           |
| NM_006429                                       | Homo sapiens CCT7                                              | 0.39      | 11      |                           |
| AW464023                                        | EST                                                            | 0.39      | 5       |                           |
| BP111699                                        | EST                                                            | 0.39      | 5       |                           |
| AW463677                                        | EST                                                            | 0.39      | 6       |                           |
| K02130                                          | Bos taurus cytochrome P-450 (SCC)                              | 0.41      | 5       |                           |
| AF004133                                        | Sus scrofa adipocyte membrane protein                          | 0.41      | 1       | Membrane protein          |
| D50047                                          | Bos taurus KQ217 MHC class II DQA2                             | 0.42      | 5       | Cytokine family           |
| NM_012198                                       | Homo sapiens grancalcin (GCL)                                  | 0.42      | 3       |                           |
| BP112100                                        | EST                                                            | 0.43      | 5       |                           |
| AW461508                                        | EST                                                            | 0.43      | 5       |                           |
| BP107921                                        | EST                                                            | 0.43      | 11      |                           |
| AF080067                                        | Oryctolagus cuniculus SMVT                                     | 0.43      | 6       |                           |
| AW356197                                        | EST                                                            | 0.43      | 11      |                           |
| L41543                                          | Bos taurus epithelial mucin (MUC1)                             | 0.43      | 11      | Cell adhesion             |
| AW462849                                        | EST                                                            | 0.44      | 11      |                           |
| AF192330                                        | Bos taurus PAG-13                                              | 0.46      | 5       | Cytokine family           |
| AF177394                                        | Homo sapiens dickkopf-1 (DKK-1)                                | 0.47      | 5       |                           |
| BP107489                                        | EST                                                            | 0.47      | 5       |                           |
| AW464053                                        | EST                                                            | 0.47      | 5       |                           |
| Day 28F / Day 28EEM up-regulated genes (2 <)    |                                                                |           |         |                           |
| AF161496                                        | Homo sapiens HSPC147                                           | 2.00      | 9       |                           |
| AW479517                                        | EST                                                            | 2.00      | 8       |                           |
| AW345567                                        | EST                                                            | 2.01      | 12      |                           |
| AI816701                                        | EST                                                            | 2.01      | 7       |                           |
| AW426436                                        | EST                                                            | 2.01      | 12      |                           |
| NM_004530                                       | Homo sapiens MMP-2                                             | 2.01      | 7       | ECM & related             |
| L10325                                          | Bos taurus glutathione peroxidase (GPx) plasma isoform         | 2.01      | 7       | Enzyme                    |
| X53553                                          | Bos taurus insulin-like growth factor II (IGF-II)              | 2.01      | 10      | Cytokine family           |
| AW425047                                        | EST                                                            | 2.01      | 8       |                           |
| BP112833                                        | EST                                                            | 2.01      | 1       |                           |
| D84557                                          | Homo sapiens HsMcm6                                            | 2.02      | 12      |                           |
| AW485951                                        | EST                                                            | 2.03      | 12      |                           |
| BP111504                                        | EST                                                            | 2.04      | 8       |                           |
| AW315092                                        | EST                                                            | 2.04      | 10      |                           |
| NM_010064                                       | Mus musculus Dncic2                                            | 2.04      | 3       | Cytoskelton               |
| U41668                                          | Homo sapiens deoxyguanosine kinase                             | 2.04      | 3       | Enzyme                    |
| AW307840                                        | EST                                                            | 2.04      | 3       |                           |
| AW314100                                        | EST                                                            | 2.04      | 10      |                           |
| AF083246                                        | Homo sapiens HSPC028                                           | 2.05      | 12      |                           |
| AW432050                                        | EST                                                            | 2.05      | 9       |                           |
| NM_001827                                       | Homo sapiens CDC28 protein kinase 2 (CKS2)                     | 2.05      | 8       | Apoptosis & Cell cycle    |

|           |                                                             |      |    |                            |
|-----------|-------------------------------------------------------------|------|----|----------------------------|
| X00354    | Bos taurus gamma globin                                     | 2.05 | 7  |                            |
| AF092565  | Homo sapiens splicing factor Prp8                           | 2.06 | 6  | Transcriptional regulator  |
| AF034607  | Homo sapiens chloride channel ABP                           | 2.07 | 8  | Membrane protein           |
| AF002693  | Homo sapiens ATQL1 pseudogene                               | 2.07 | 2  |                            |
| AI326172  | EST                                                         | 2.07 | 12 |                            |
| AJ000186  | Homo sapiens MAD2 protein                                   | 2.07 | 7  | Cytokine family            |
| AI276594  | EST                                                         | 2.07 | 3  |                            |
| AW427732  | EST                                                         | 2.08 | 3  |                            |
| AB017335  | Homo sapiens KNSL4 and MAZ                                  | 2.08 | 2  | Apoptosis & Cell cycle     |
| AI827165  | EST                                                         | 2.09 | 8  |                            |
| AW481254  | EST                                                         | 2.09 | 10 |                            |
| AF161447  | Homo sapiens HSPC329                                        | 2.10 | 8  |                            |
| AW345789  | EST                                                         | 2.10 | 9  |                            |
| AF110801  | Homo sapiens interleukin-18 binding protein c precursor     | 2.10 | 9  | Cytokine family            |
| AW315457  | EST                                                         | 2.11 | 9  |                            |
| AF039698  | Homo sapiens antigen NY-CO-33                               | 2.11 | 7  | Cytokine family            |
| BP112517  | EST                                                         | 2.11 | 1  |                            |
| AW427810  | EST                                                         | 2.11 | 10 |                            |
| BP111255  | EST                                                         | 2.11 | 7  |                            |
| U71273    | Sus scrofa glucosidase II                                   | 2.12 | 6  | Enzyme                     |
| BP110613  | EST                                                         | 2.12 | 8  |                            |
| BP109873  | EST                                                         | 2.13 | 7  |                            |
| BP109935  | EST                                                         | 2.15 | 7  |                            |
| AC002550  | Homo sapiens BAC clone CIT987SK-A-101F10                    | 2.16 | 9  |                            |
| AF086313  | Homo sapiens clone ZD52B10                                  | 2.17 | 6  |                            |
| AB004275  | Bos taurus VEGF-C                                           | 2.17 | 1  | Cytokine family            |
| BP109933  | EST                                                         | 2.17 | 12 |                            |
| AW353298  | EST                                                         | 2.18 | 6  |                            |
| AW314471  | EST                                                         | 2.18 | 3  |                            |
| BP109730  | EST                                                         | 2.18 | 2  |                            |
| BP106960  | EST                                                         | 2.19 | 9  |                            |
| AL137647  | Homo sapiens clone DKFZp586M2424                            | 2.19 | 10 |                            |
| BP112666  | EST                                                         | 2.20 | 3  |                            |
| D14074    | Bos taurus cyclophilin                                      | 2.21 | 8  |                            |
| BP112133  | EST                                                         | 2.21 | 1  |                            |
| AW416500  | EST                                                         | 2.21 | 2  |                            |
| U49973    | Homo sapiens Tigger1 transposable element                   | 2.22 | 9  |                            |
| AW299830  | EST                                                         | 2.22 | 10 |                            |
| NM_002130 | Homo sapiens HMGCS1                                         | 2.23 | 6  | Enzyme                     |
| AI952986  | EST                                                         | 2.23 | 8  |                            |
| AW483954  | EST                                                         | 2.24 | 3  |                            |
| AW344559  | EST                                                         | 2.24 | 4  |                            |
| BP111358  | EST                                                         | 2.24 | 10 |                            |
| U21661    | Rattus norvegicus myotrophin                                | 2.24 | 2  | Cytokine family            |
| AW427170  | EST                                                         | 2.24 | 7  |                            |
| X13698    | Bos taurus ribonucleoprotein SS-B/La                        | 2.25 | 10 | Nuclear protein            |
| NM_001145 | Homo sapiens RNase A family 5 (ANG)                         | 2.26 | 10 | Enzyme                     |
| BP109382  | EST                                                         | 2.26 | 7  |                            |
| U19921    | Homo sapiens synaptotagmin I                                | 2.26 | 1  |                            |
| X59693    | Bos taurus ubiquinol-cytochrome-c reductase (subunit II)    | 2.26 | 6  | Enzyme                     |
| BP109023  | EST                                                         | 2.27 | 7  |                            |
| NM_003011 | Homo sapiens SET translocation                              | 2.28 | 10 |                            |
| AW462084  | EST                                                         | 2.31 | 8  |                            |
| AJ132772  | Bos taurus futb and rtlf                                    | 2.32 | 6  |                            |
| BP107868  | EST                                                         | 2.33 | 2  |                            |
| AF198487  | Homo sapiens transcription factor LBP-1b                    | 2.34 | 4  | Transcriptional regulator  |
| AW314471  | EST                                                         | 2.35 | 3  |                            |
| NM_005563 | Homo sapiens stathmin 1/oncprotein 18 (STMN1)               | 2.36 | 4  | Oncogene & Tumor inhibitor |
| AF144763  | Bos taurus TIMP-1 protein                                   | 2.36 | 3  | ECM & related              |
| AF043937  | Homo sapiens DHAPAT                                         | 2.37 | 9  | Enzyme                     |
| M86739    | Bos taurus neuropeptide Y receptor                          | 2.38 | 7  | Cytokine family            |
| Y16533    | Ovis aries IGF-II                                           | 2.39 | 7  | Cytokine family            |
| AW484739  | EST                                                         | 2.39 | 4  |                            |
| S76474    | Homo sapiens trkB                                           | 2.39 | 1  | Cytokine family            |
| AF113682  | Homo sapiens clone FLB3436 PRO0868                          | 2.40 | 4  |                            |
| AW345891  | EST                                                         | 2.41 | 8  |                            |
| Z25531    | Bos taurus repeat region DNA                                | 2.41 | 3  |                            |
| BP108502  | EST                                                         | 2.43 | 9  |                            |
| AW353230  | EST                                                         | 2.45 | 3  |                            |
| AW477773  | EST                                                         | 2.49 | 10 |                            |
| H27490    | EST                                                         | 2.49 | 10 |                            |
| AF195417  | Homo sapiens DEAD-box protein abstrakt (ABS)                | 2.51 | 2  |                            |
| BP111076  | EST                                                         | 2.52 | 7  |                            |
| AW446540  | EST                                                         | 2.52 | 9  |                            |
| NM_006719 | Homo sapiens transcript variant ABLIM-m                     | 2.53 | 1  | Cytoskelton                |
| AW466068  | EST                                                         | 2.56 | 8  |                            |
| AB043994  | Bos taurus MMP-2                                            | 2.56 | 7  | ECM & related              |
| AW195100  | EST                                                         | 2.57 | 2  |                            |
| BP107329  | EST                                                         | 2.62 | 4  |                            |
| AF057300  | Homo sapiens truncated RAD50 protein                        | 2.63 | 3  |                            |
| AW194656  | EST                                                         | 2.64 | 2  |                            |
| AL080102  | Homo sapiens clone DKFZp564N1916                            | 2.64 | 9  |                            |
| AB028449  | Homo sapiens helicase-MOI                                   | 2.65 | 9  | DNA binding protein        |
| BP111624  | EST                                                         | 2.67 | 7  |                            |
| NM_006838 | Homo sapiens methionine methionyl aminopeptidase 2          | 2.72 | 4  | Enzyme                     |
| AW411362  | EST                                                         | 2.75 | 9  |                            |
| BP111800  | EST                                                         | 2.76 | 7  |                            |
| AA453356  | EST                                                         | 2.79 | 3  |                            |
| AT001971  | EST                                                         | 2.79 | 2  |                            |
| NM_006491 | Homo sapiens NOVA1 transcript variant 3                     | 2.82 | 1  | Oncogene & Tumor inhibitor |
| NM_004458 | Homo sapiens FACLA transcript variant 1                     | 2.84 | 7  | Enzyme                     |
| AF000137  | Bos taurus connective tissue growth factor precursor (CTGF) | 2.85 | 12 | Cytokine family            |
| AW020030  | EST                                                         | 3.06 | 7  |                            |
| AW485227  | EST                                                         | 3.15 | 10 |                            |
| AW173315  | EST                                                         | 3.40 | 10 |                            |
| AW486974  | EST                                                         | 3.58 | 10 |                            |
| L34261    | Bos taurus palmitoyl-protein thioesterase                   | 4.32 | 6  | Enzyme                     |
| BP108345  | EST                                                         | 4.60 | 7  |                            |
